# Supplementary material for: Bu4NI-catalyzed, oxidative C(sp2)–C(sp3) cross dehydrogenative coupling for the regioselective direct C-3 benzylation of 2H-indazoles
Source: Royal Society of Chemistry journal article supplement (doi:10.1039/d0ob01282c), 2020-01-01

## Supporting Information

### Bu<sub>4</sub>NI-catalyzed, Oxidative C<sub>(sp<sup>2</sup>)</sub>–C<sub>(sp<sup>3</sup>)</sub> Cross

### Dehydrogenative Coupling for the Regioselective Direct C-3

### Benzylation of 2*H*-Indazoles

Lalit Yadav and Sandeep Chaudhary\*

*†*Laboratory of Organic & Medicinal chemistry, Department of Chemistry, Malaviya National

*Institute of Technology, Jawaharlal Nehru Marg, Jaipur-302017, India.*

*Fax: 911412529029; Tel: 911412713319; E-mail: [schaudhary.chy@mnit.ac.in](mailto:schaudhary.chy@mnit.ac.in)*

| S. No. | Contents                                                                         | Page No. |
|--------|----------------------------------------------------------------------------------|----------|
| 1.     | <sup>1</sup> H NMR and <sup>13</sup> C NMR Spectrum of compound <b>3a-l/4a-q</b> | S2-S31   |
| 2.     | <sup>1</sup> H NMR Spectrum of compound <b>5</b>                                 | S32      |

# 1. <sup>1</sup>H NMR and <sup>13</sup>C-NMR spectrum of 3-benzylated-2-aryl-2H-indazoles (3a-l/4a-q/5)

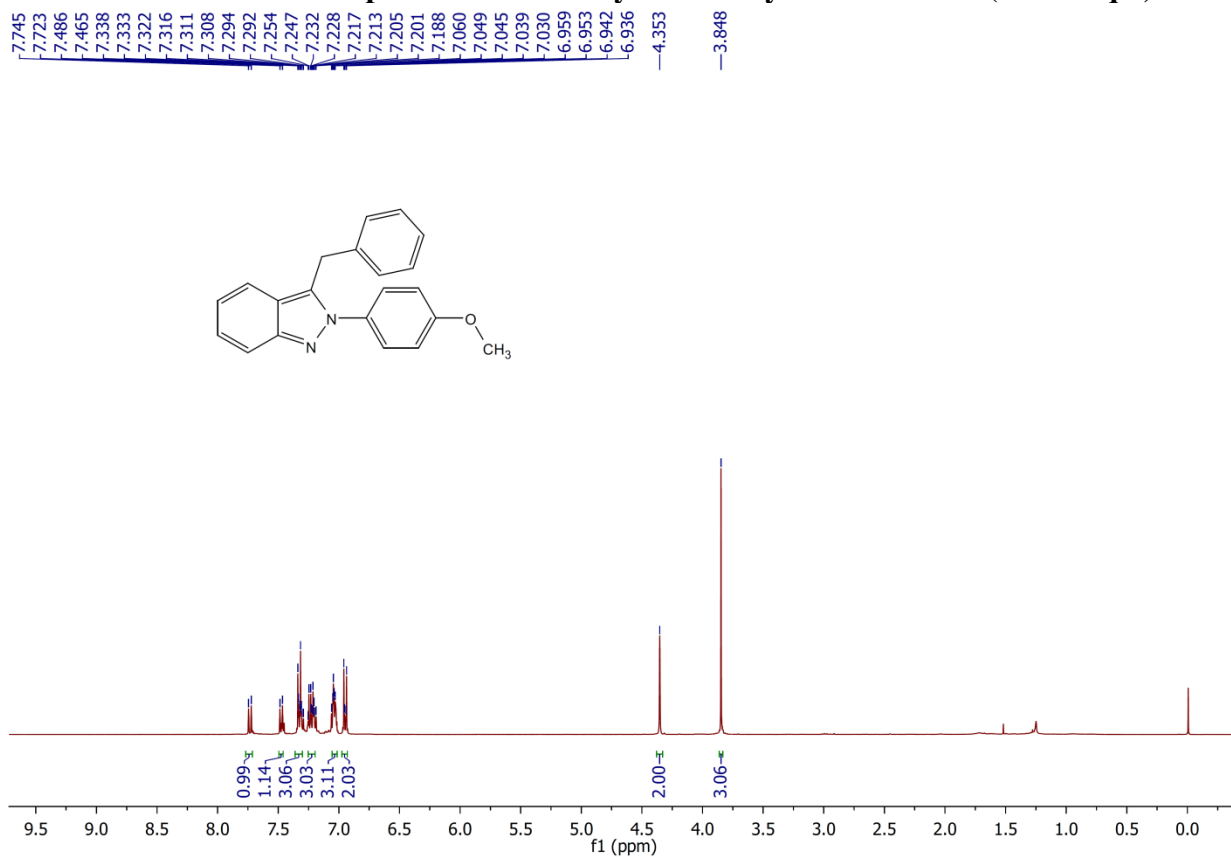

<sup>1</sup>H-NMR spectrum of compound 3a

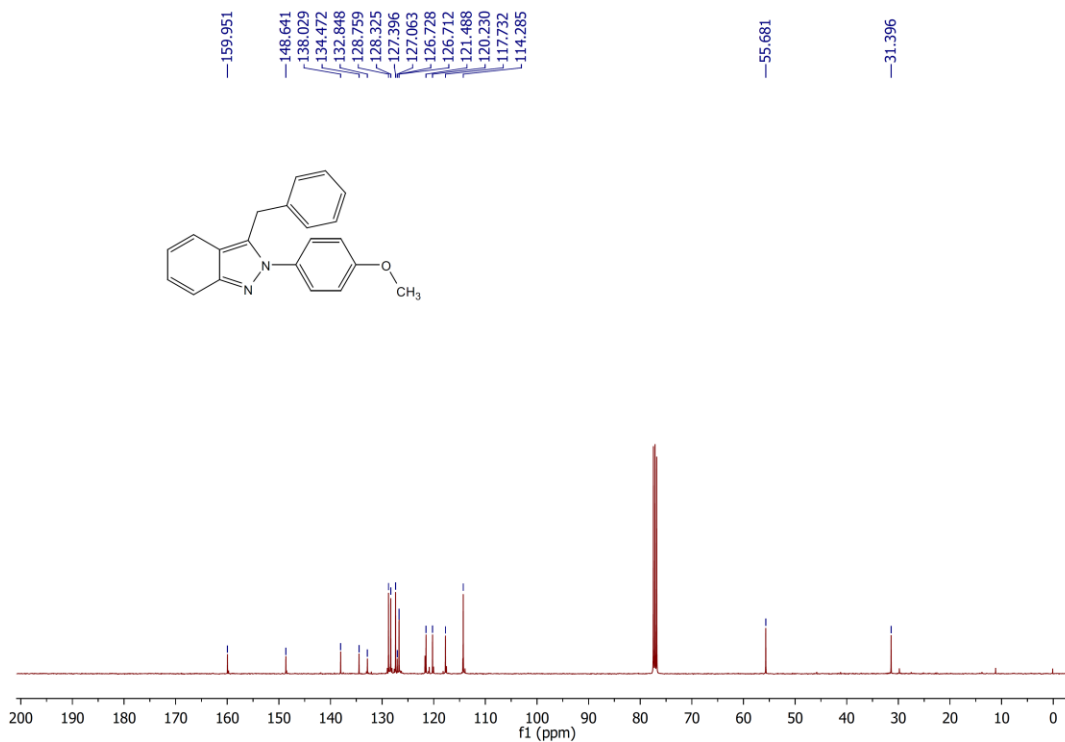

<sup>13</sup>C-NMR spectrum of compound 3a

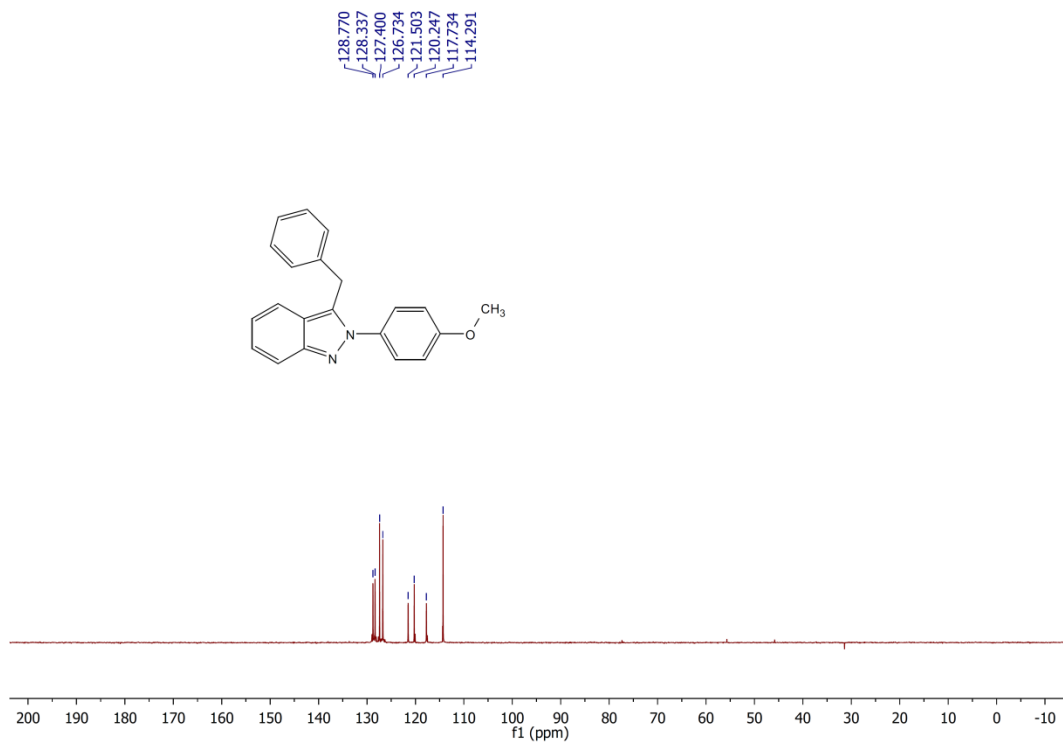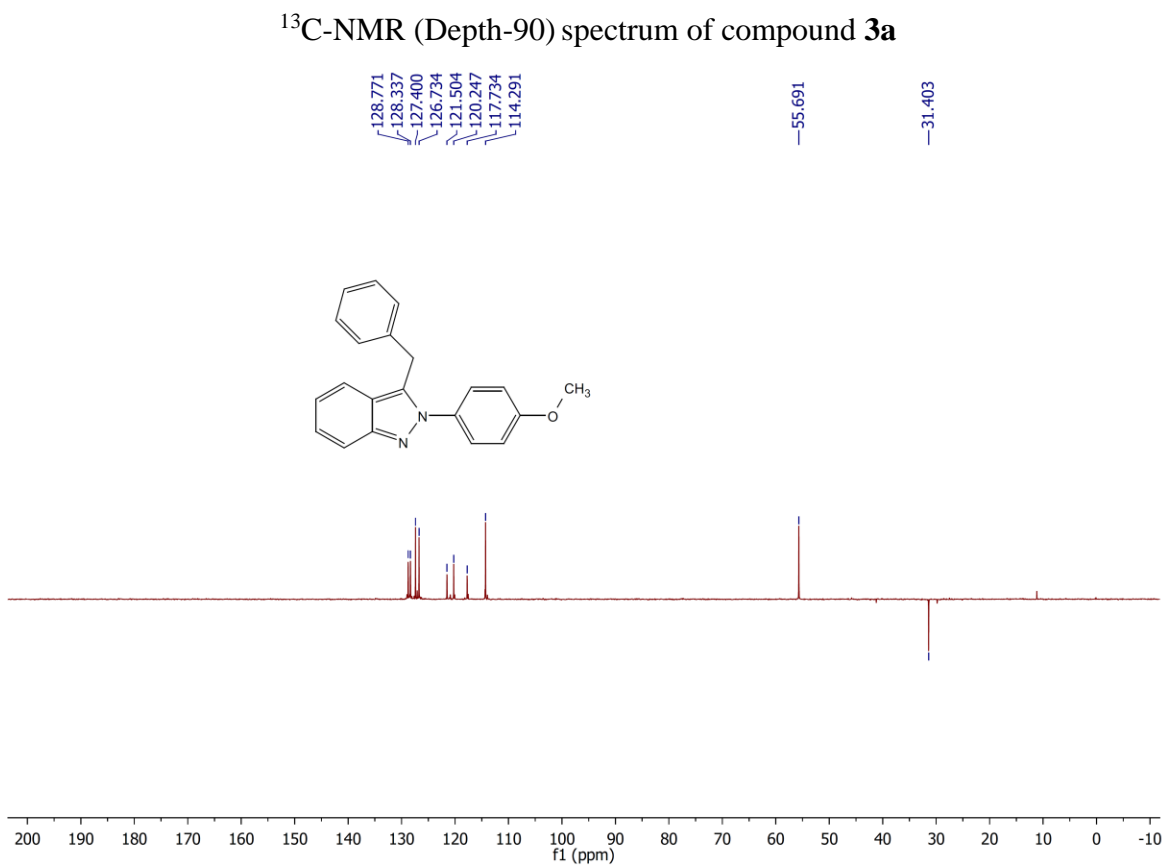

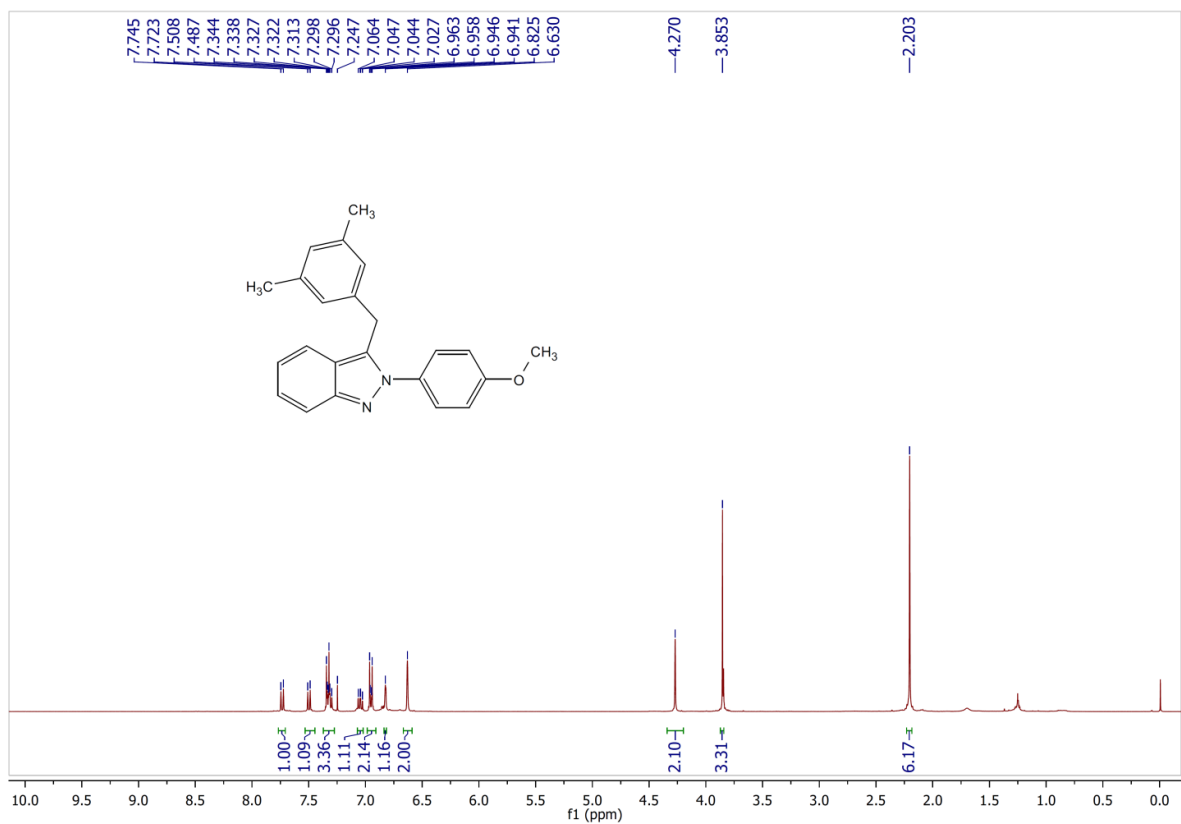

<sup>1</sup>H-NMR spectrum of compound **3b**

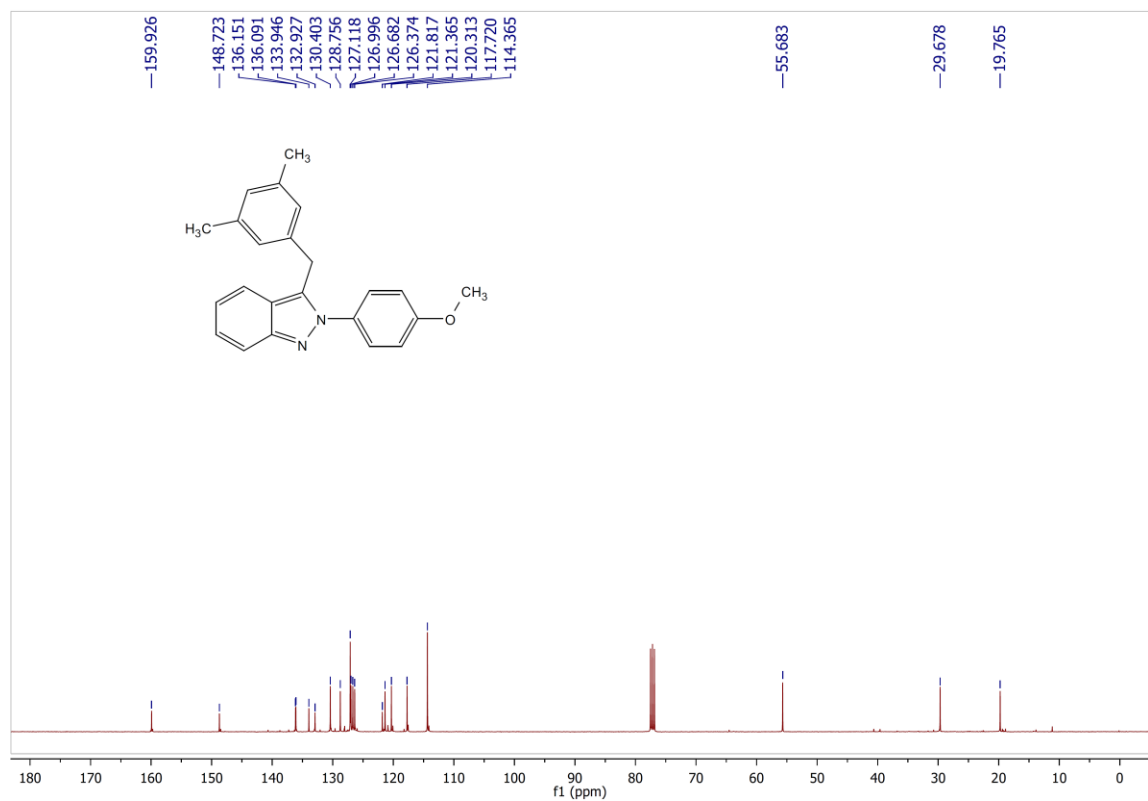

<sup>13</sup>C-NMR spectrum of compound **3b**

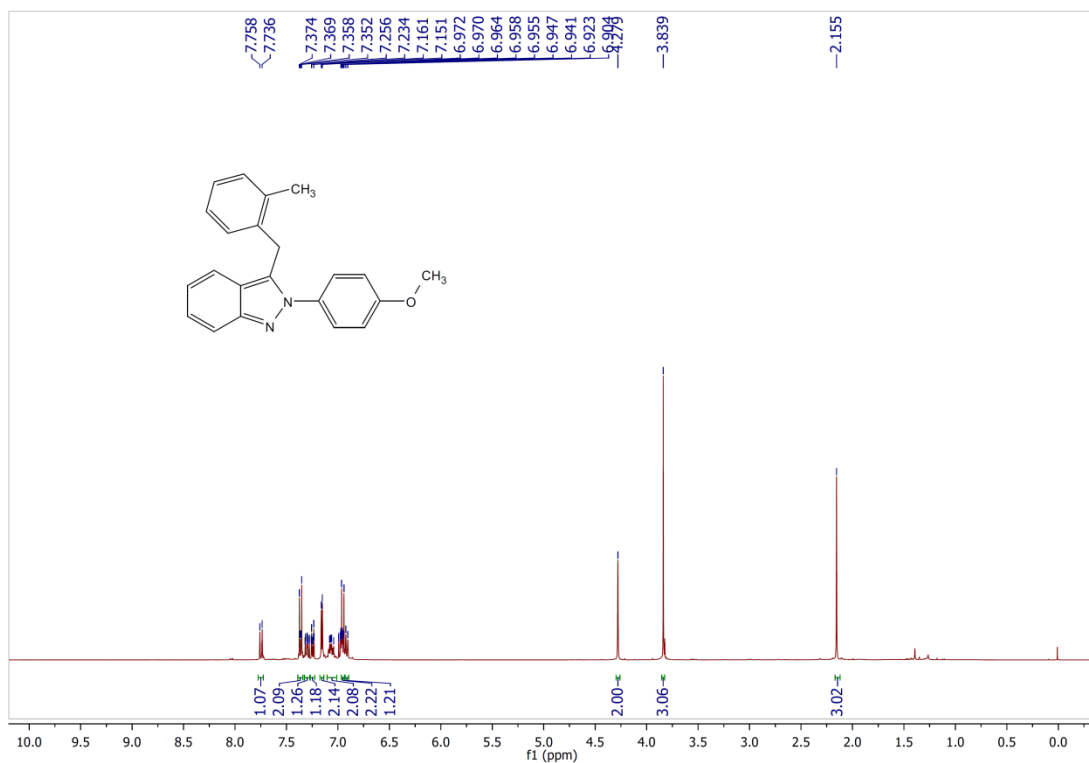

**<sup>1</sup>H-NMR spectrum of compound 3c**

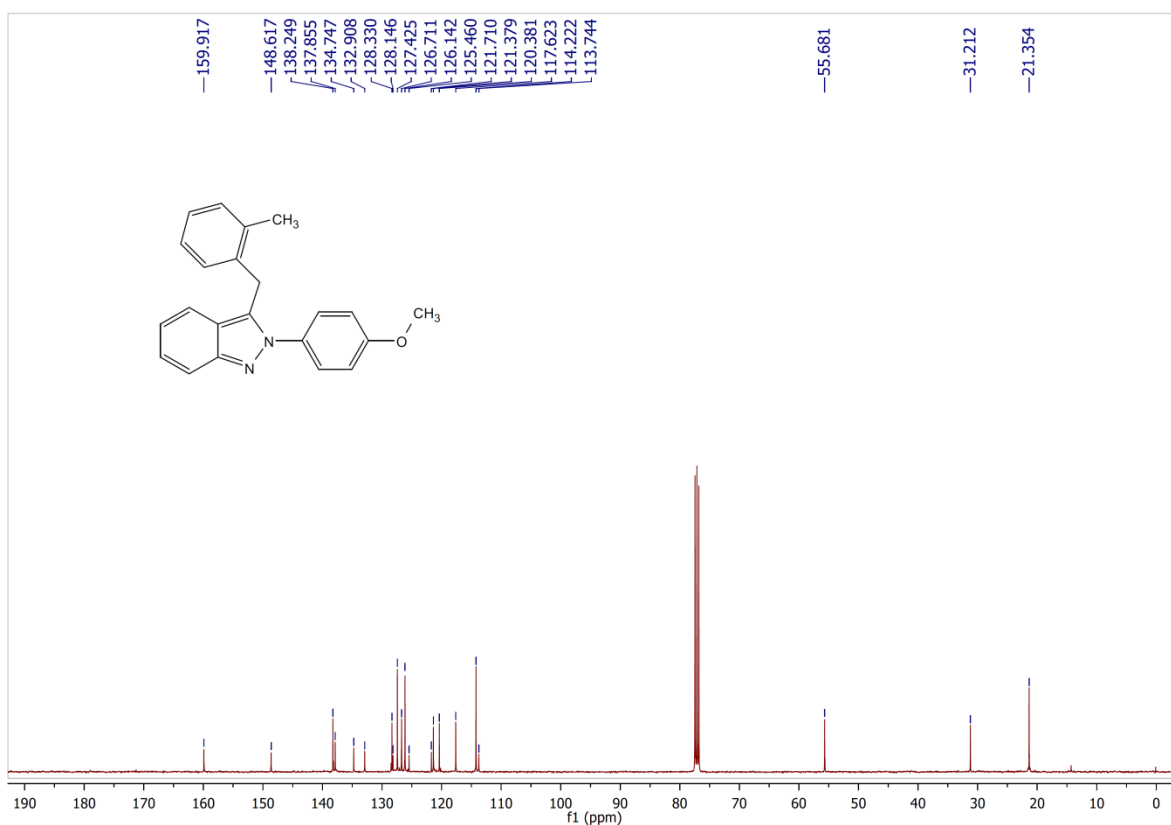

**<sup>13</sup>C-NMR spectrum of compound 3c**

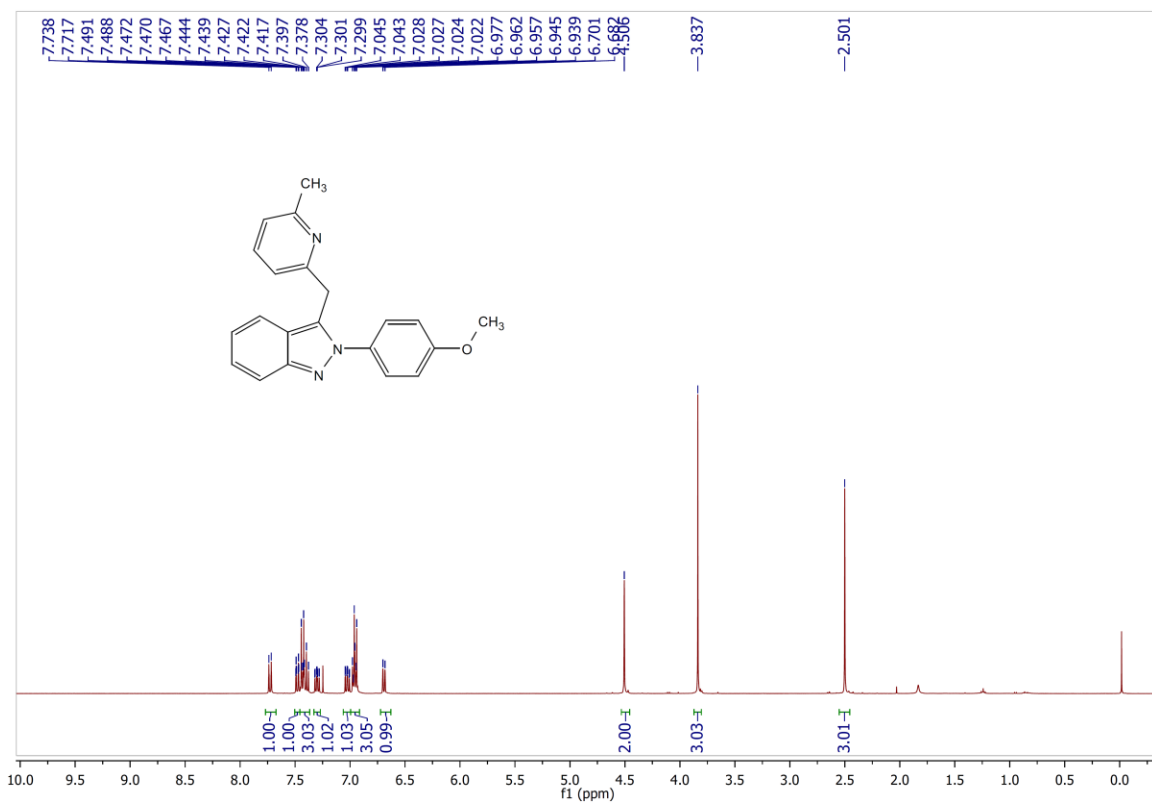

<sup>1</sup>H-NMR spectrum of compound **3d**

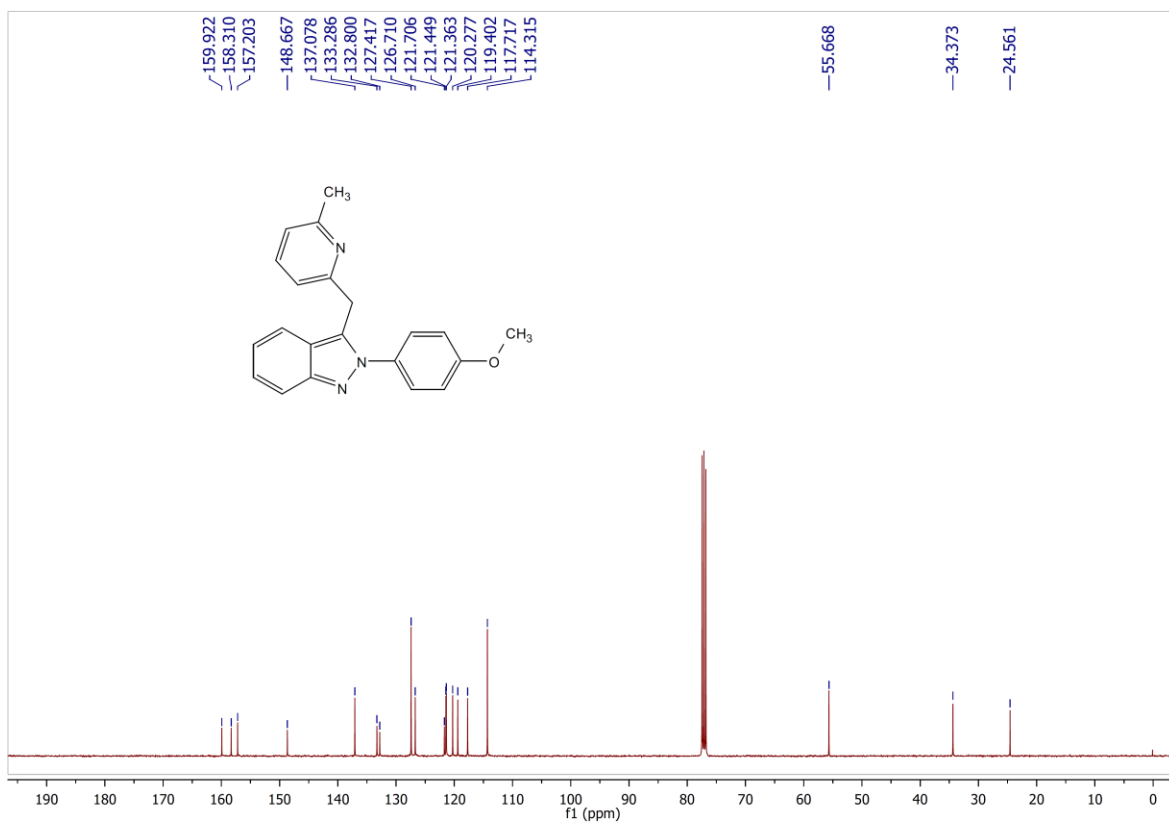

<sup>13</sup>C-NMR spectrum of compound **3d**

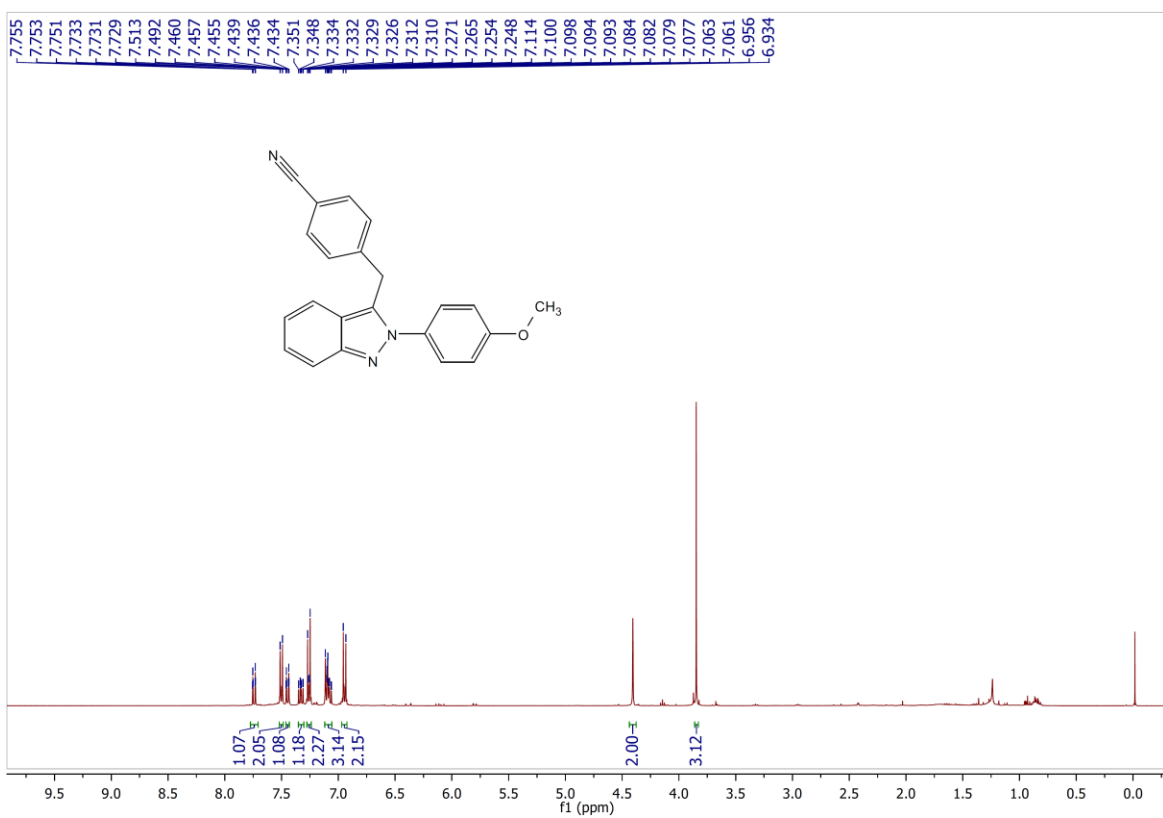

<sup>1</sup>H-NMR spectrum of compound **3e**

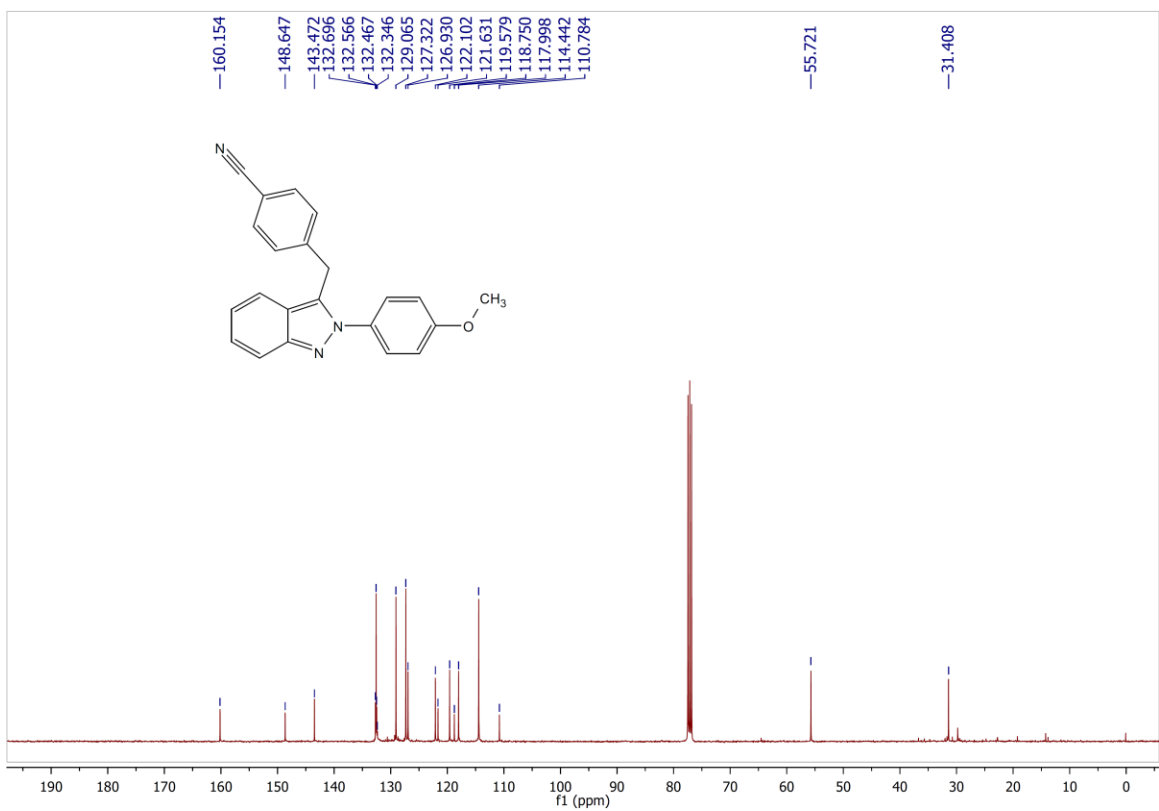

<sup>13</sup>C-NMR spectrum of compound **3e**

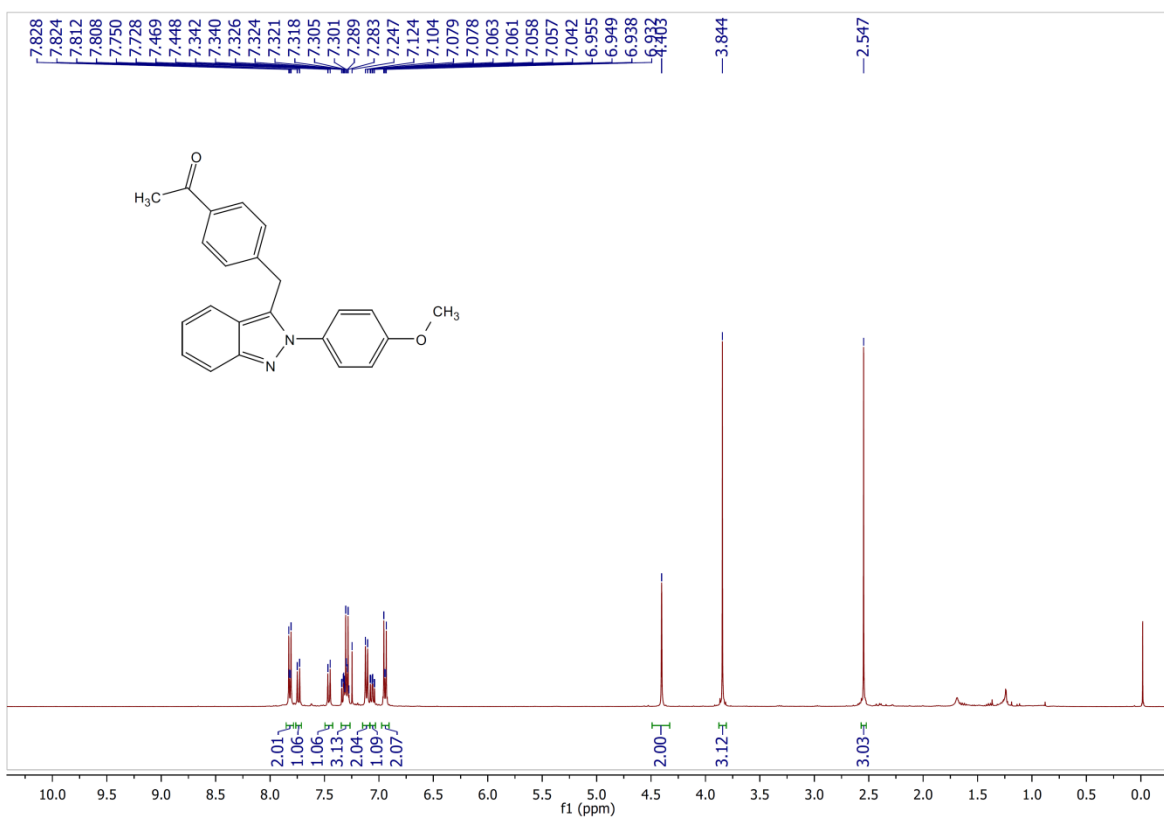

<sup>1</sup>H-NMR spectrum of compound **3f**

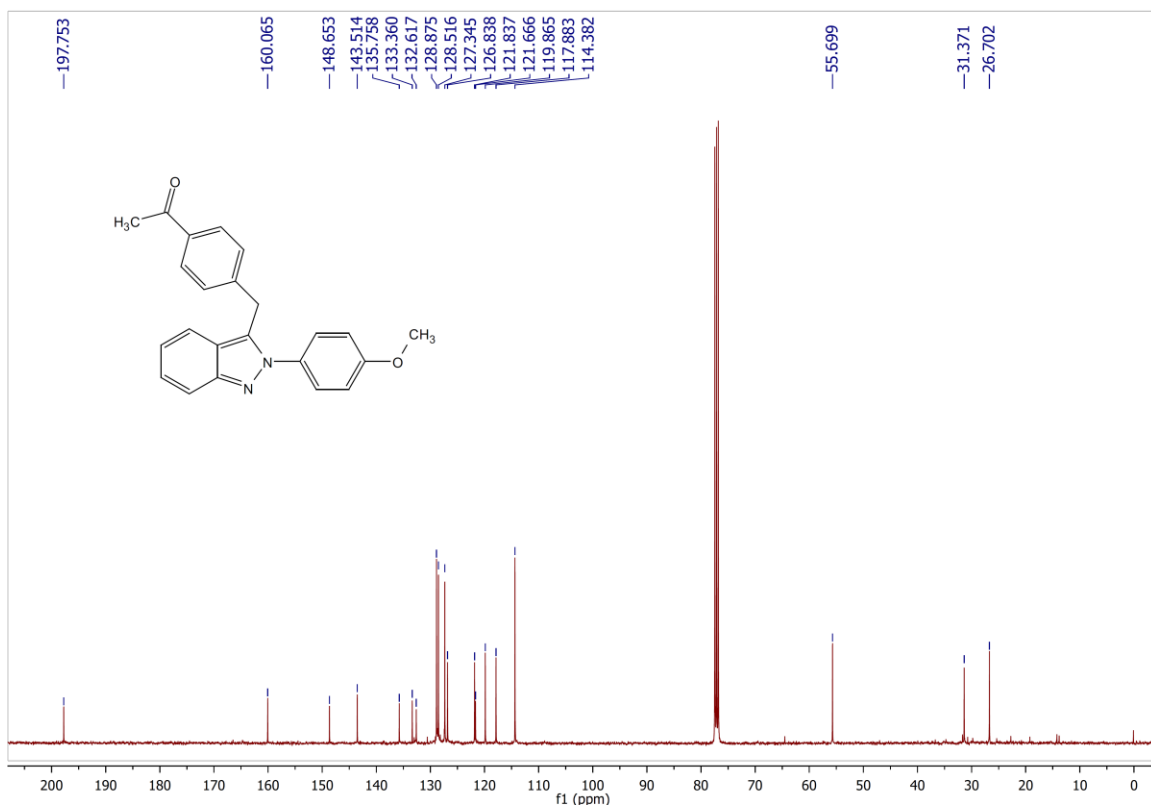

<sup>13</sup>C-NMR spectrum of compound **3f**



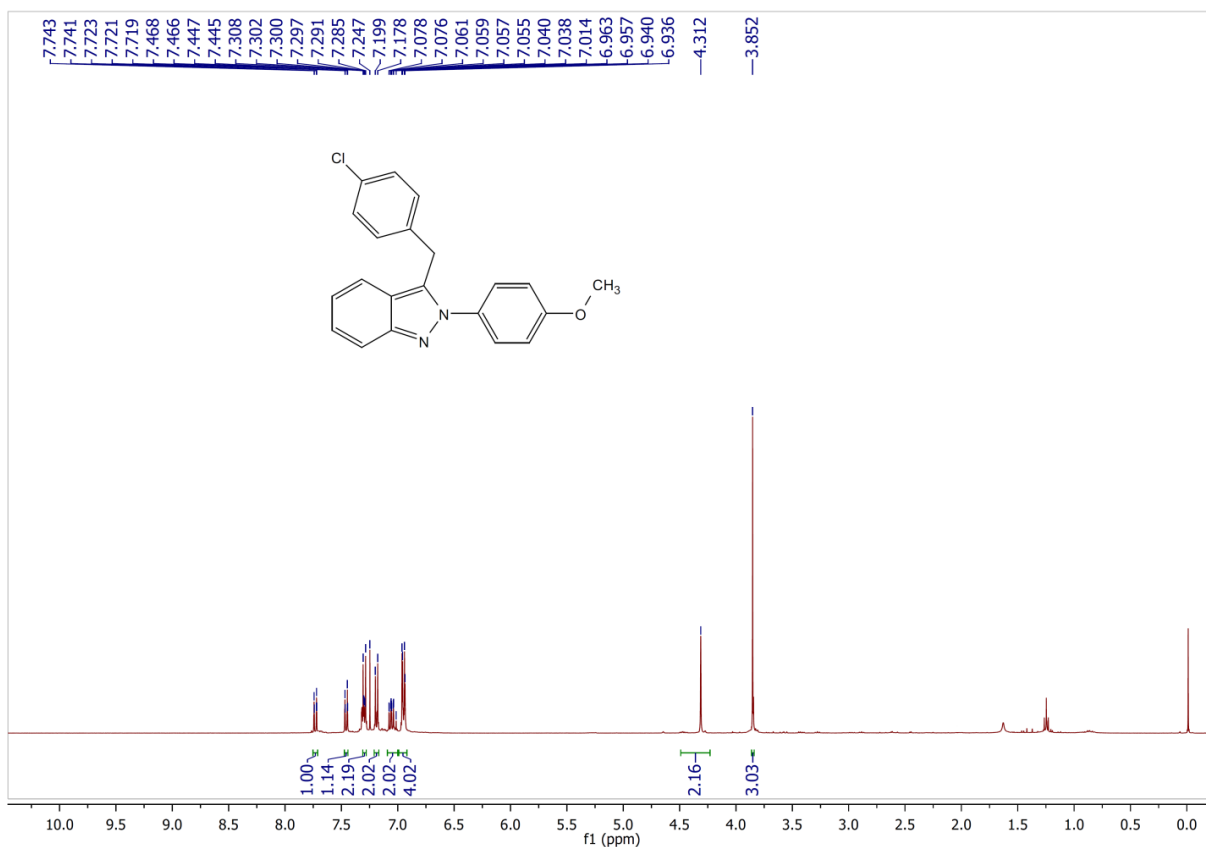

<sup>1</sup>H-NMR spectrum of compound **3g**

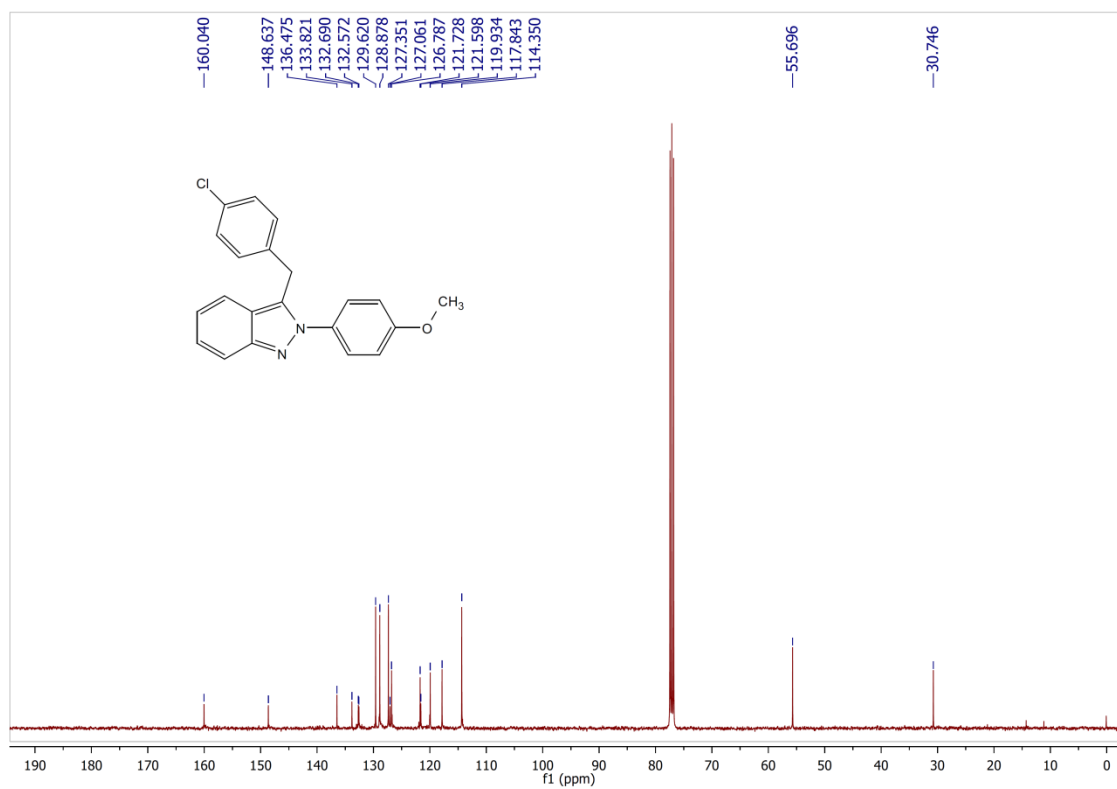

<sup>13</sup>C-NMR spectrum of compound **3g**

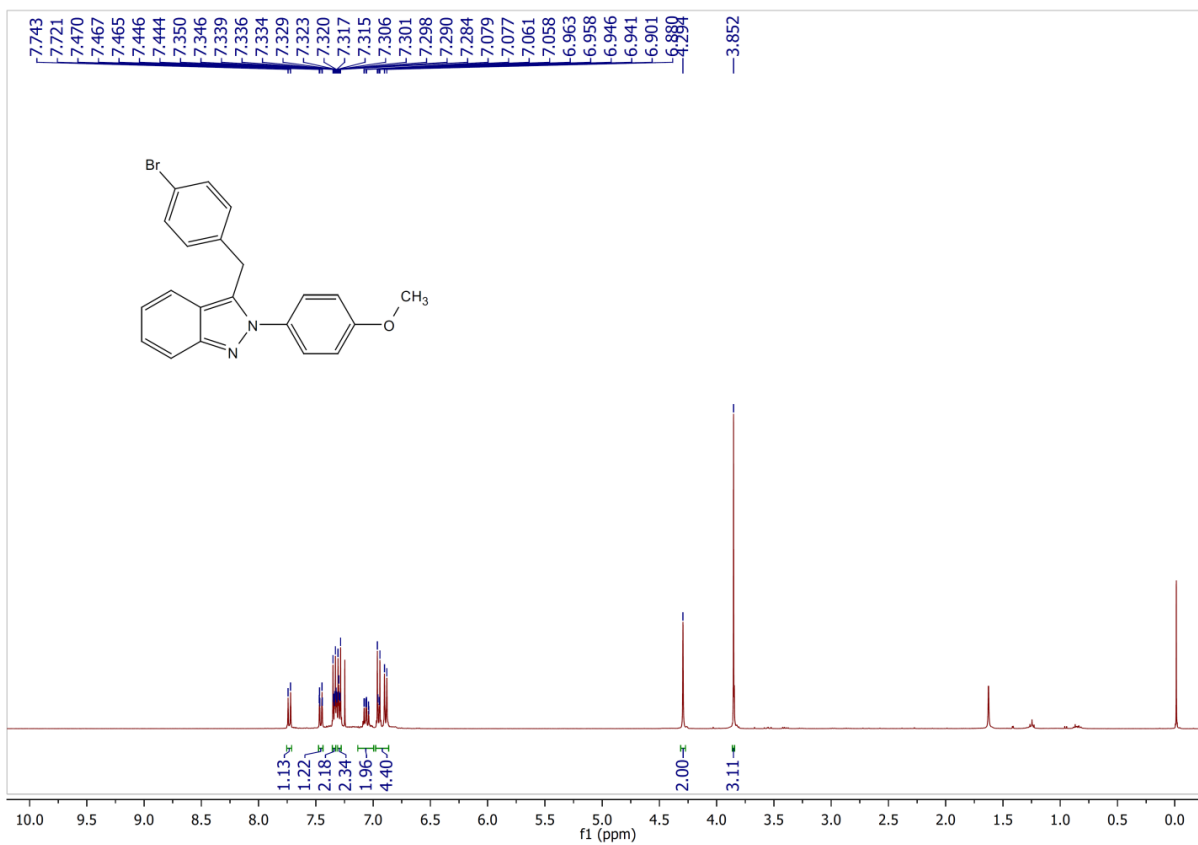

<sup>1</sup>H-NMR spectrum of compound **3h**

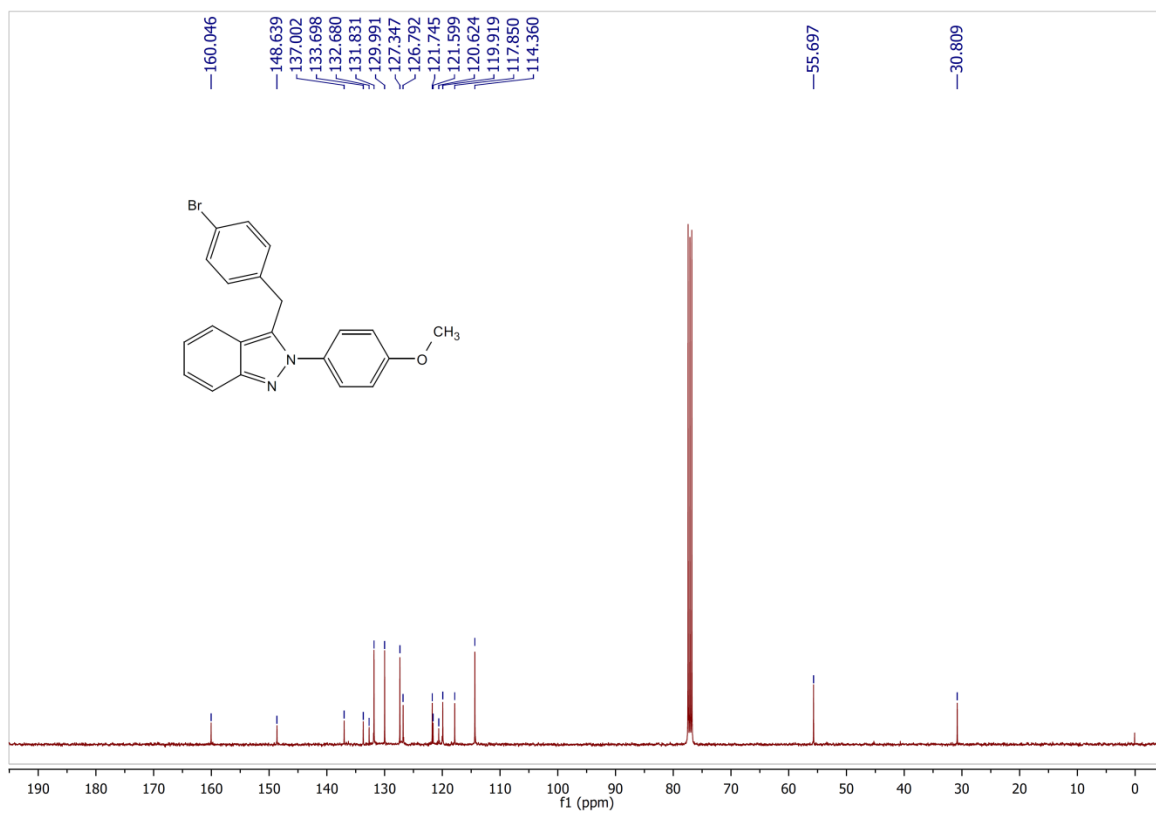

<sup>13</sup>C-NMR spectrum of compound **3h**

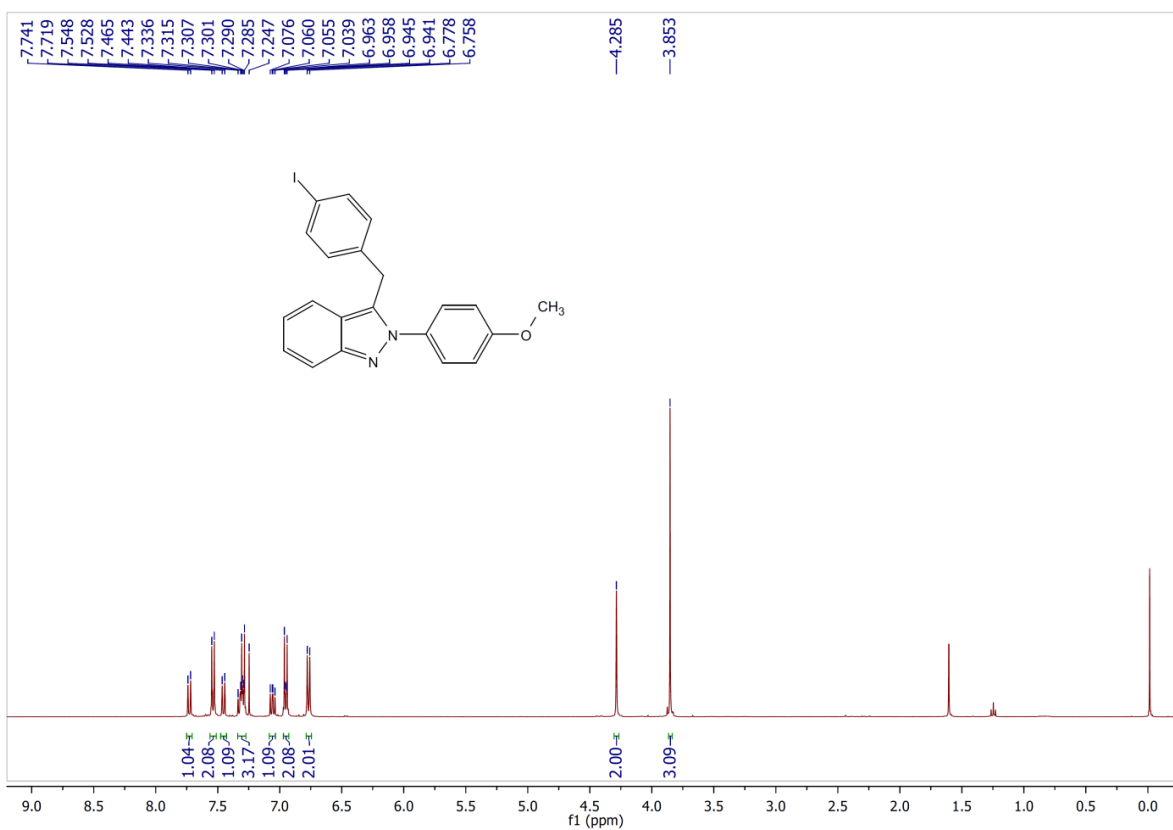

<sup>1</sup>H-NMR spectrum of compound **3i**

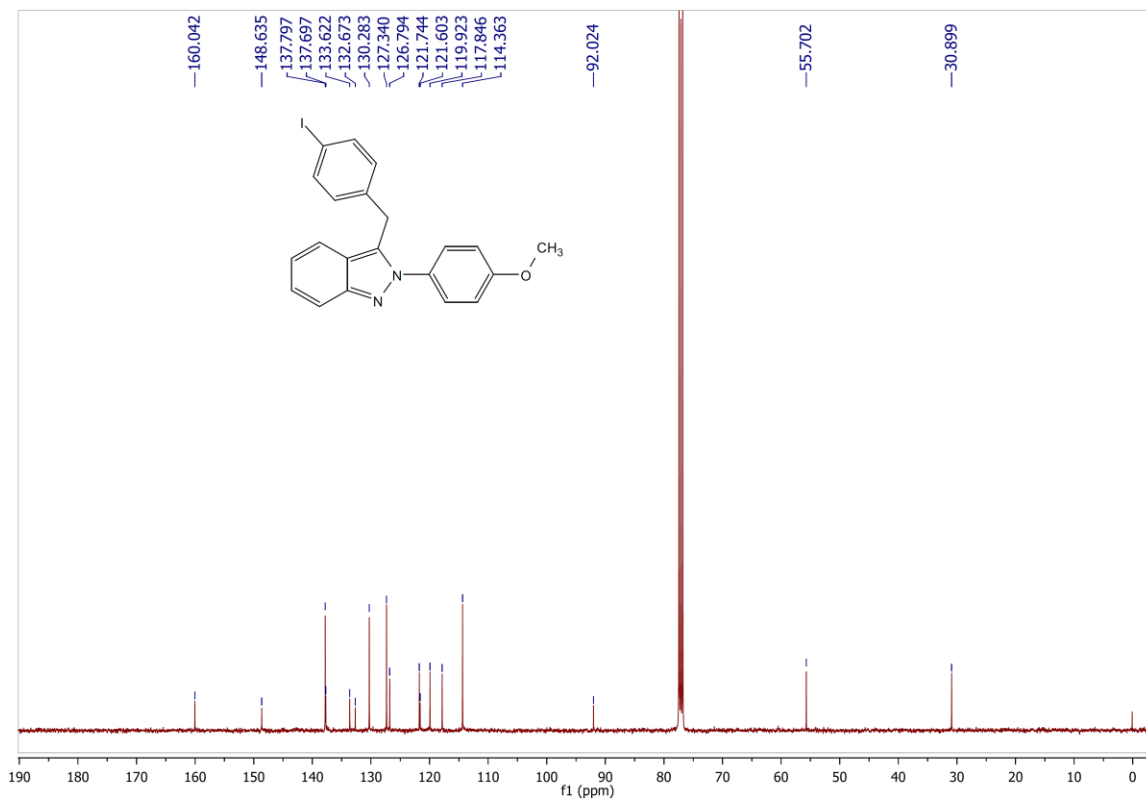

<sup>13</sup>C-NMR spectrum of compound **3i**

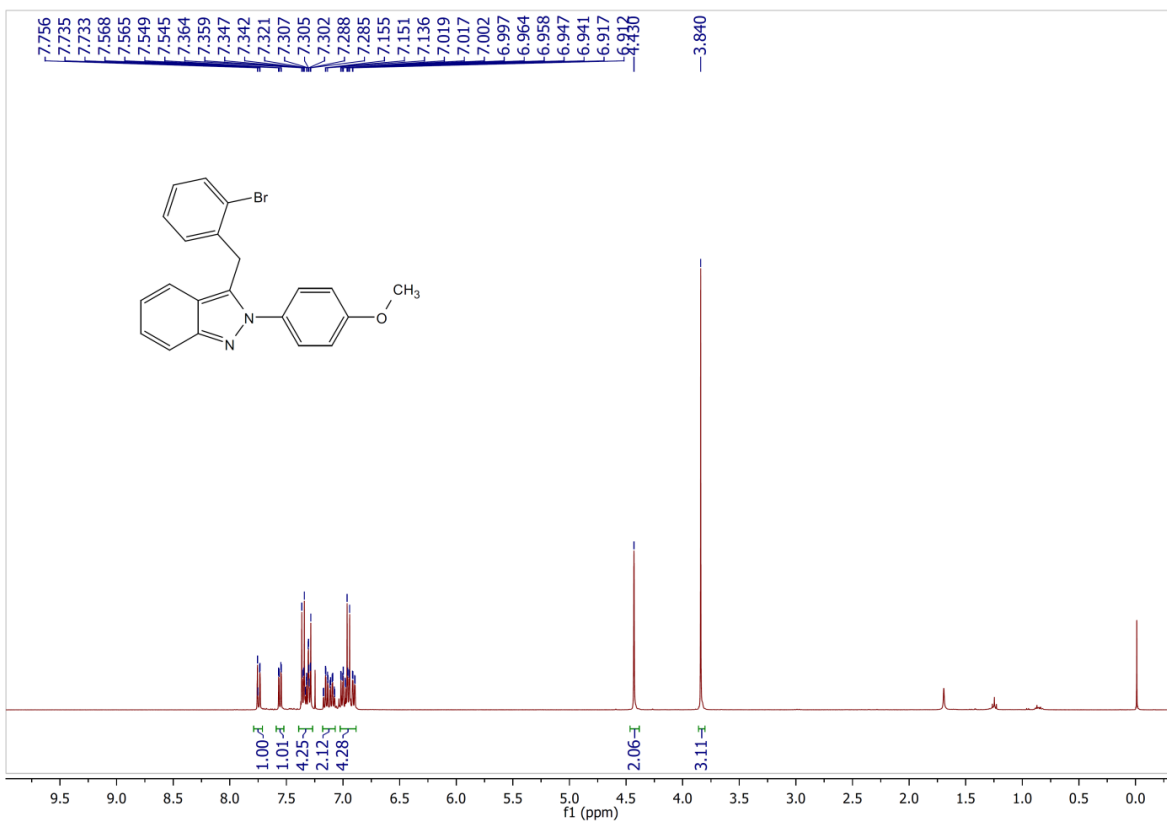

<sup>1</sup>H-NMR spectrum of compound **3j**

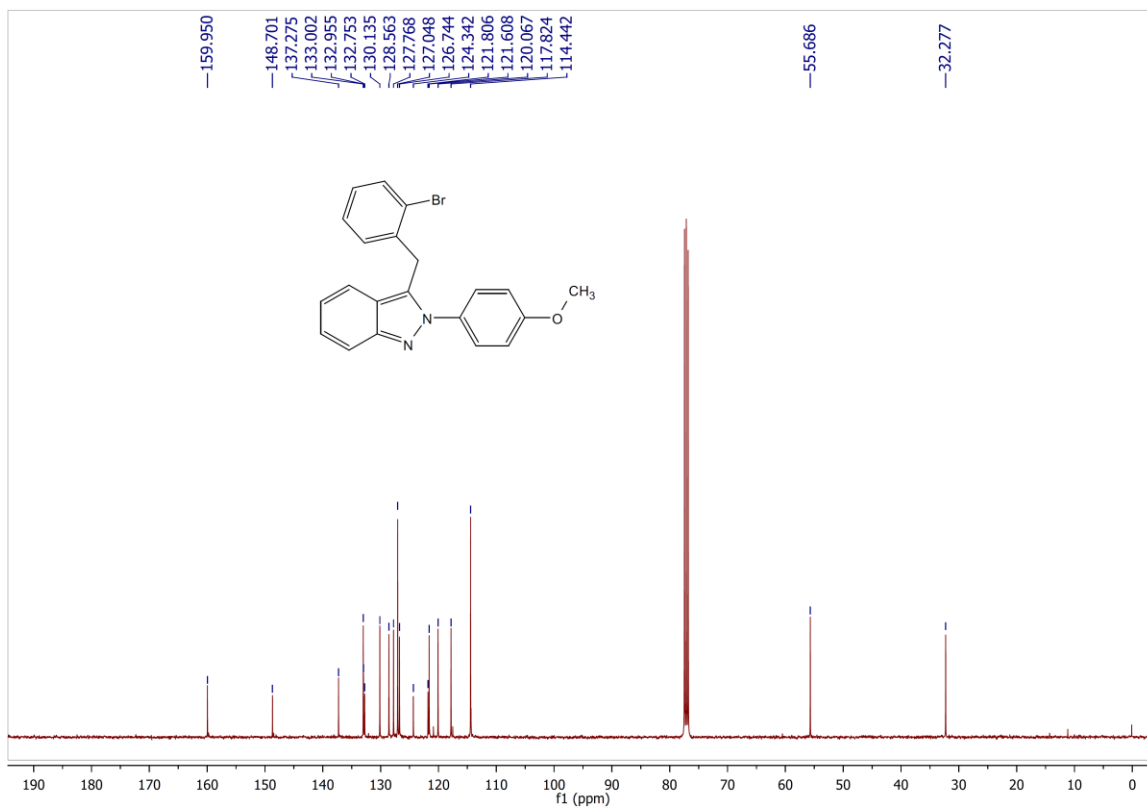

<sup>13</sup>C-NMR spectrum of compound **3j**

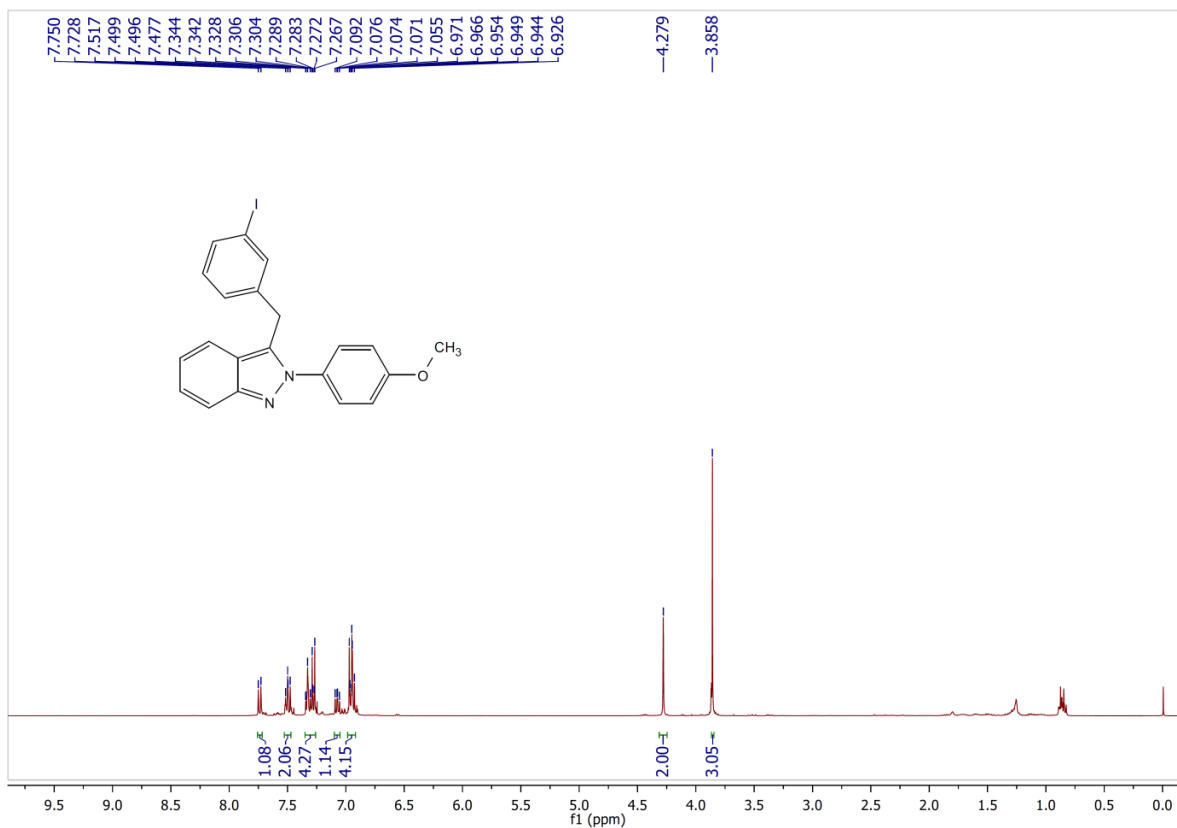

<sup>1</sup>H-NMR spectrum of compound **3k**

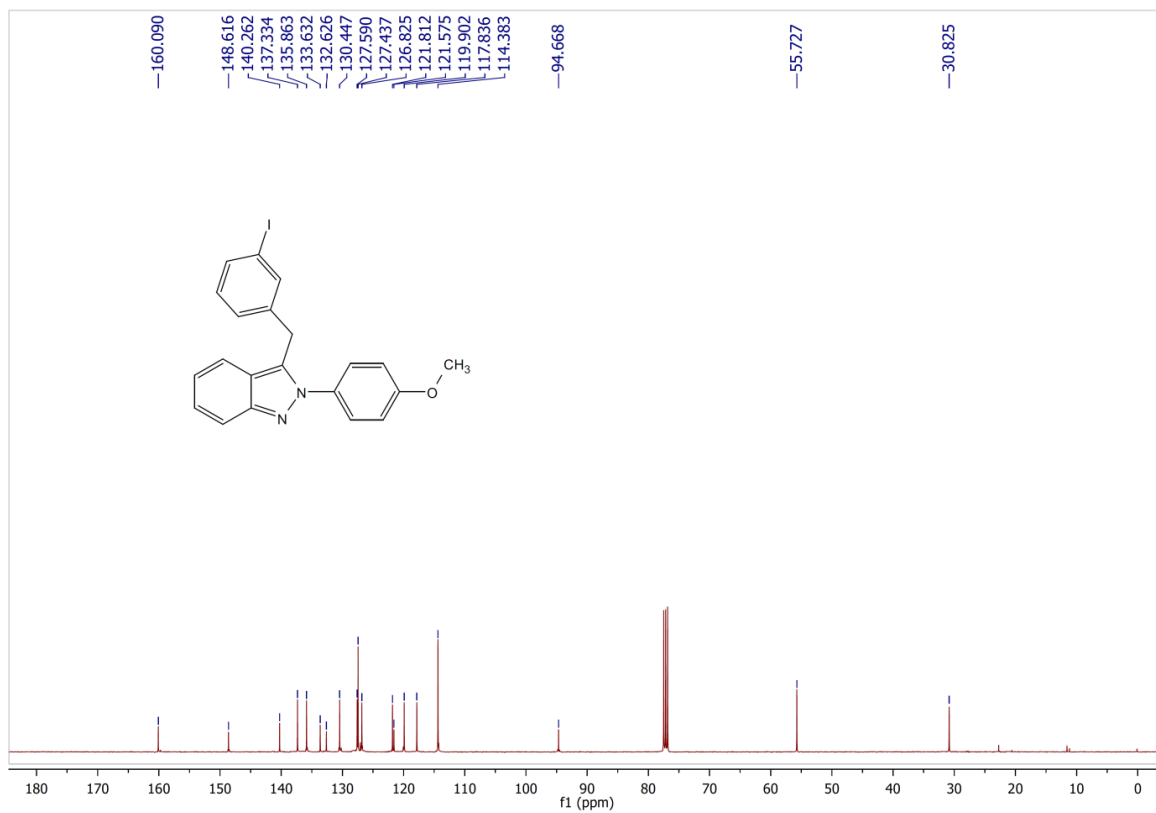

<sup>13</sup>C-NMR spectrum of compound **3k**

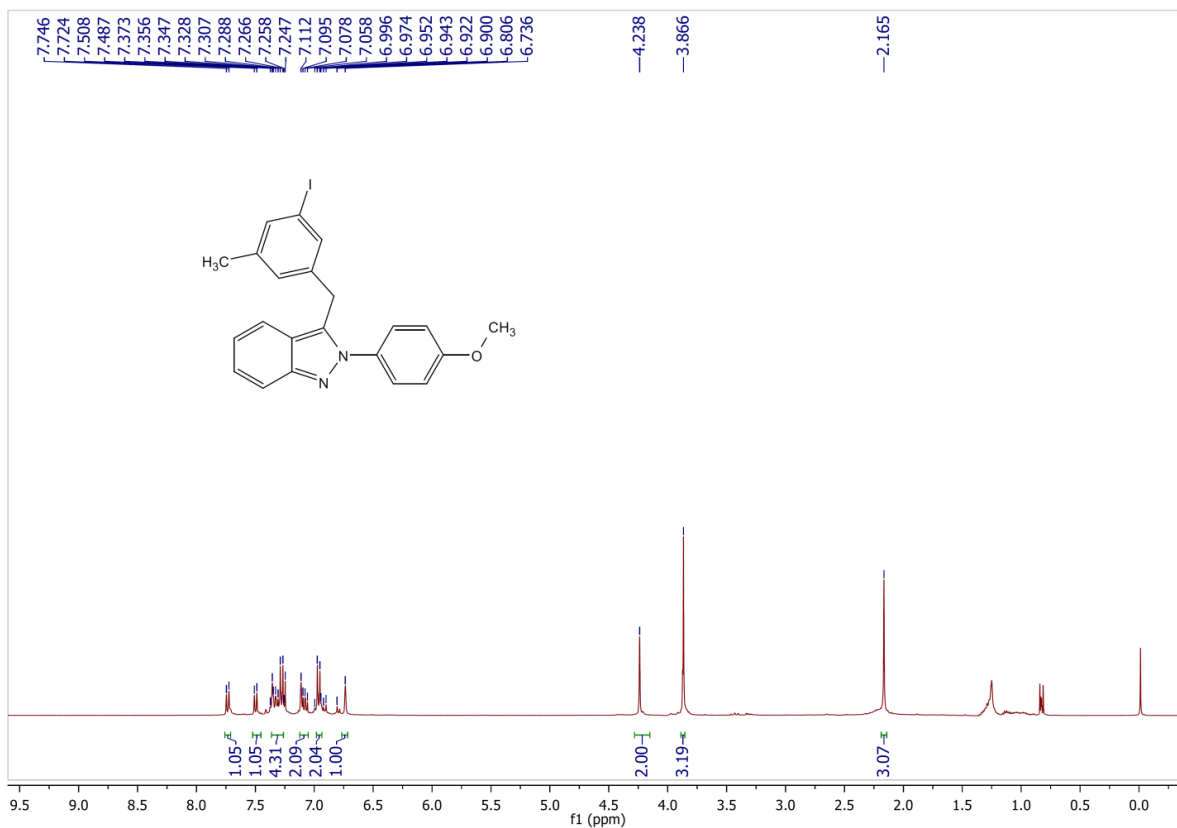

<sup>1</sup>H-NMR spectrum of compound **31**

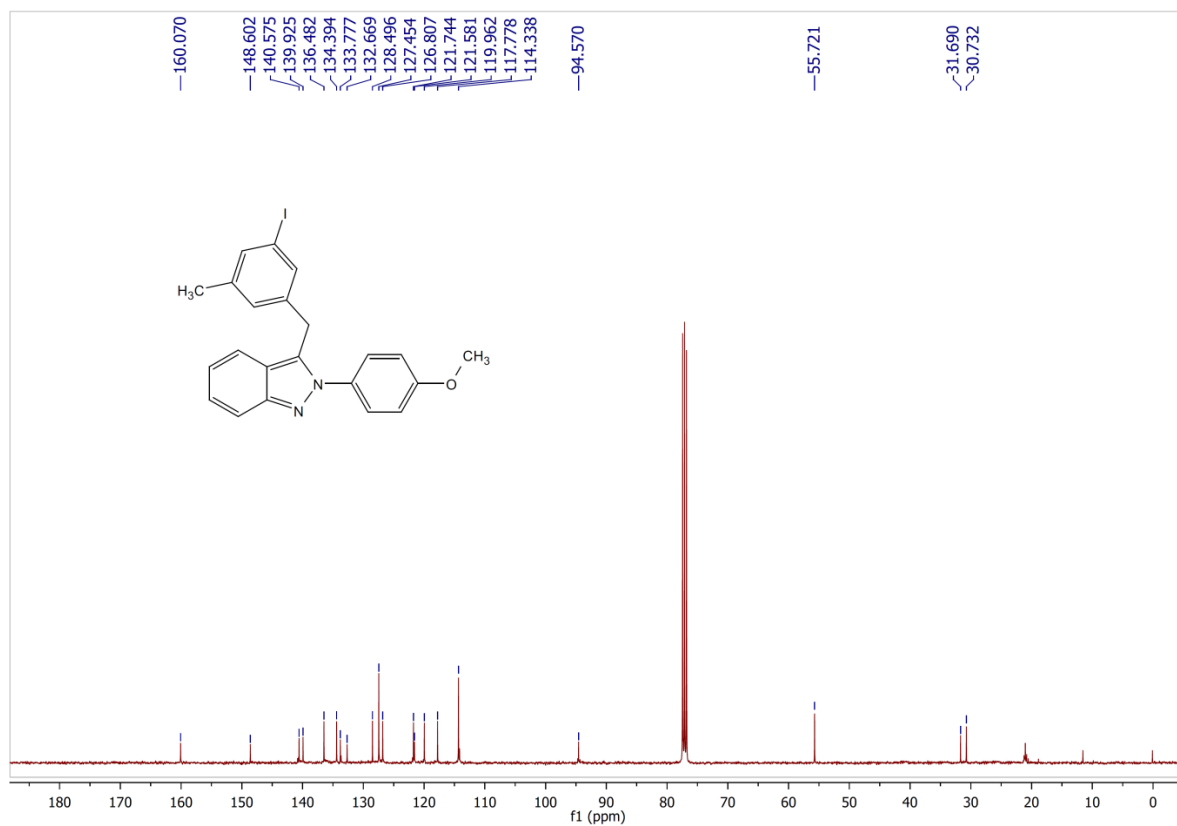

<sup>13</sup>C-NMR spectrum of compound **31**

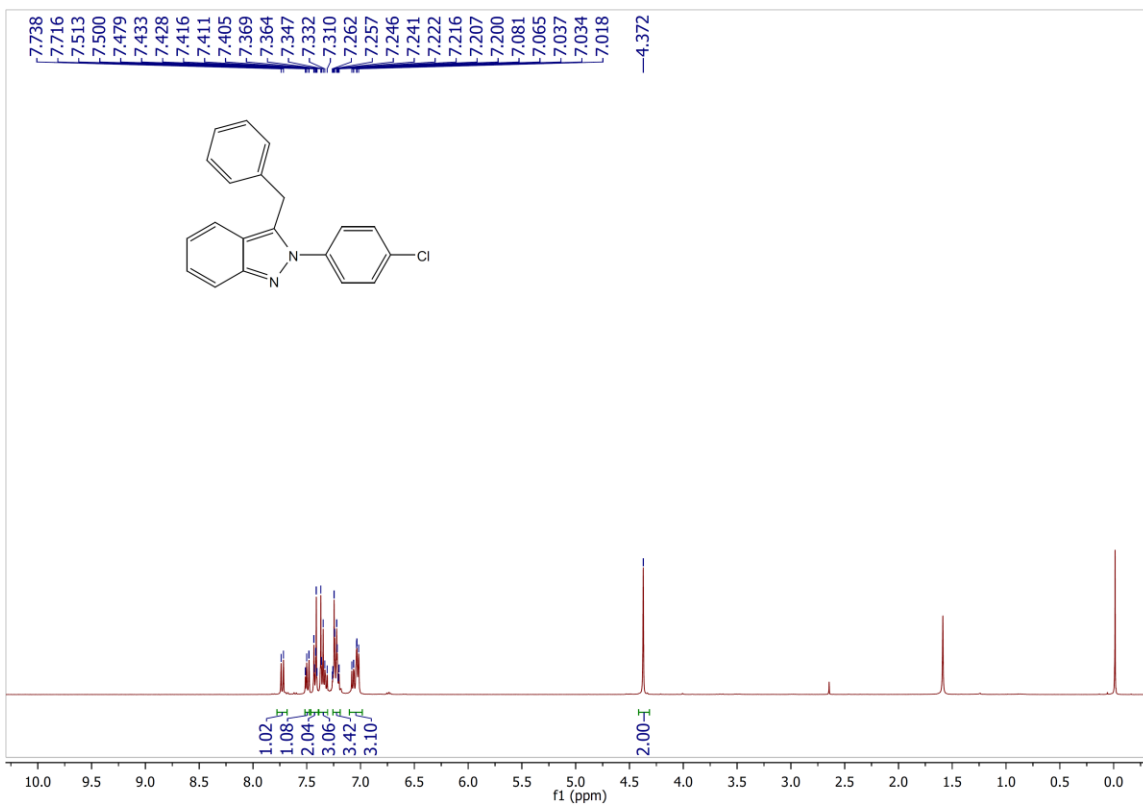

<sup>1</sup>H-NMR spectrum of compound 4a

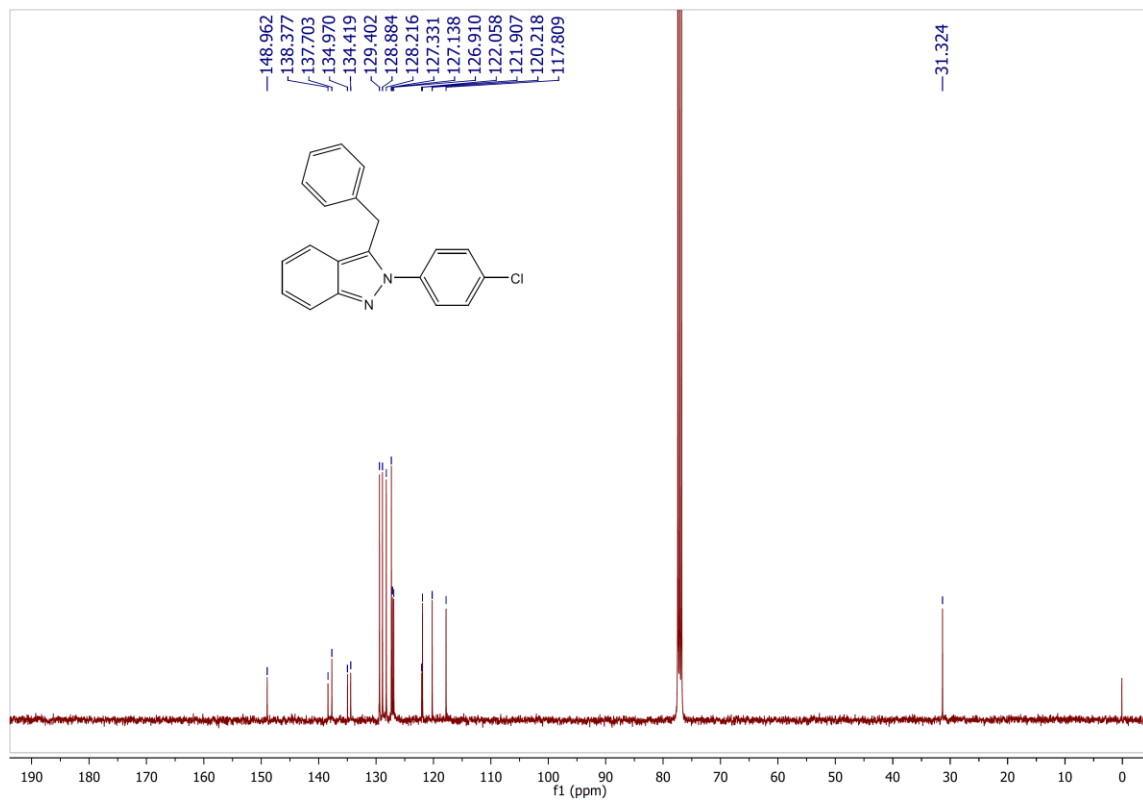

<sup>13</sup>C-NMR spectrum of compound 4a

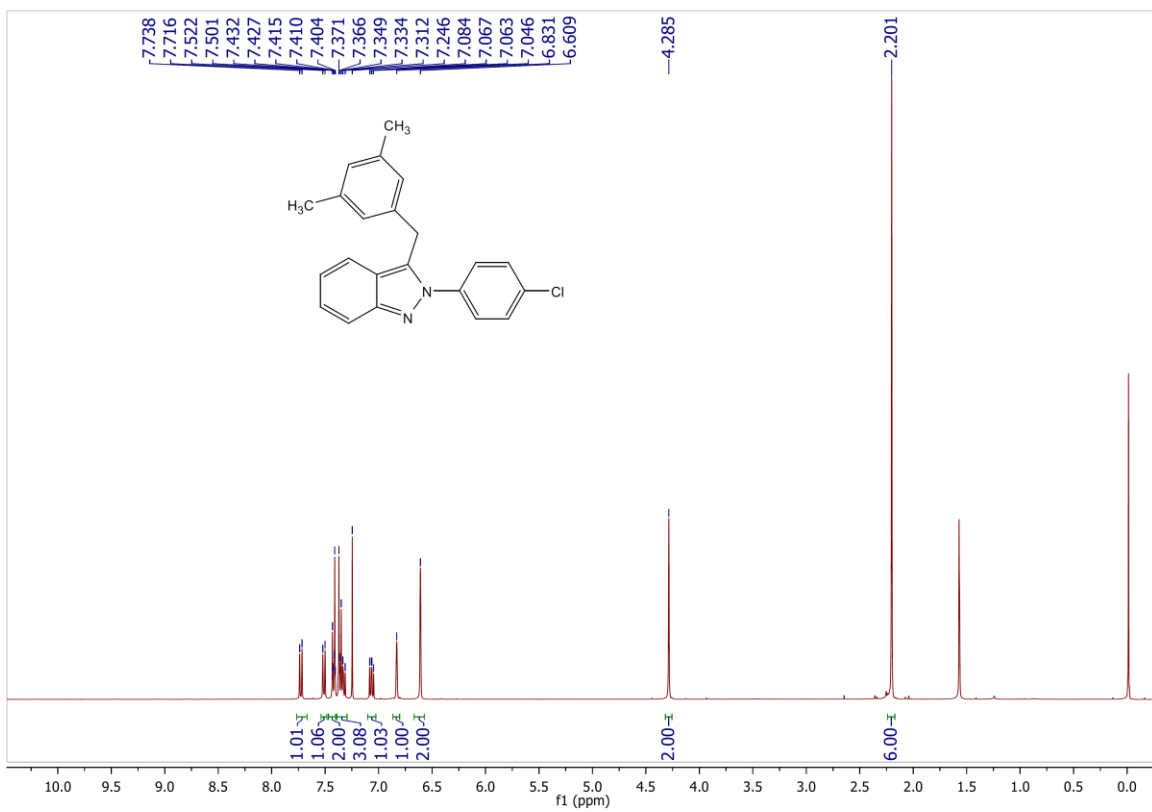

<sup>1</sup>H-NMR spectrum of compound **4b**

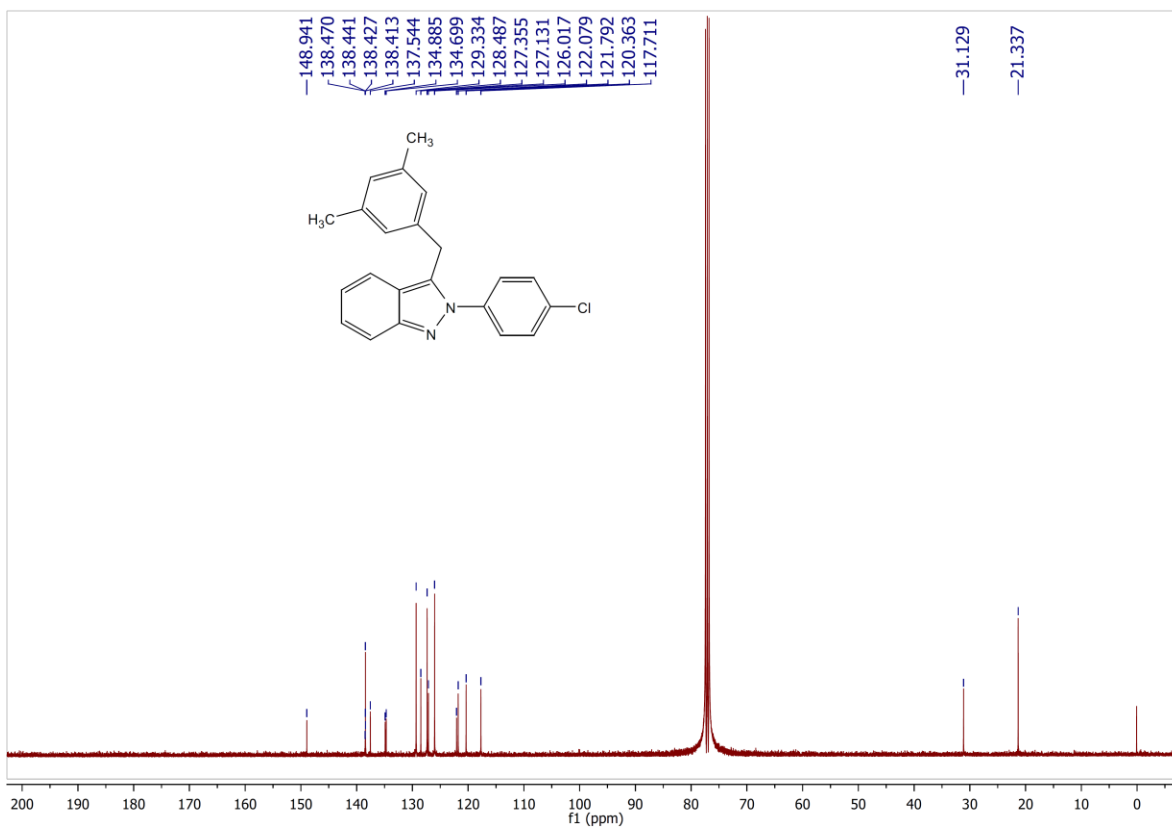

<sup>13</sup>C-NMR spectrum of compound **4b**



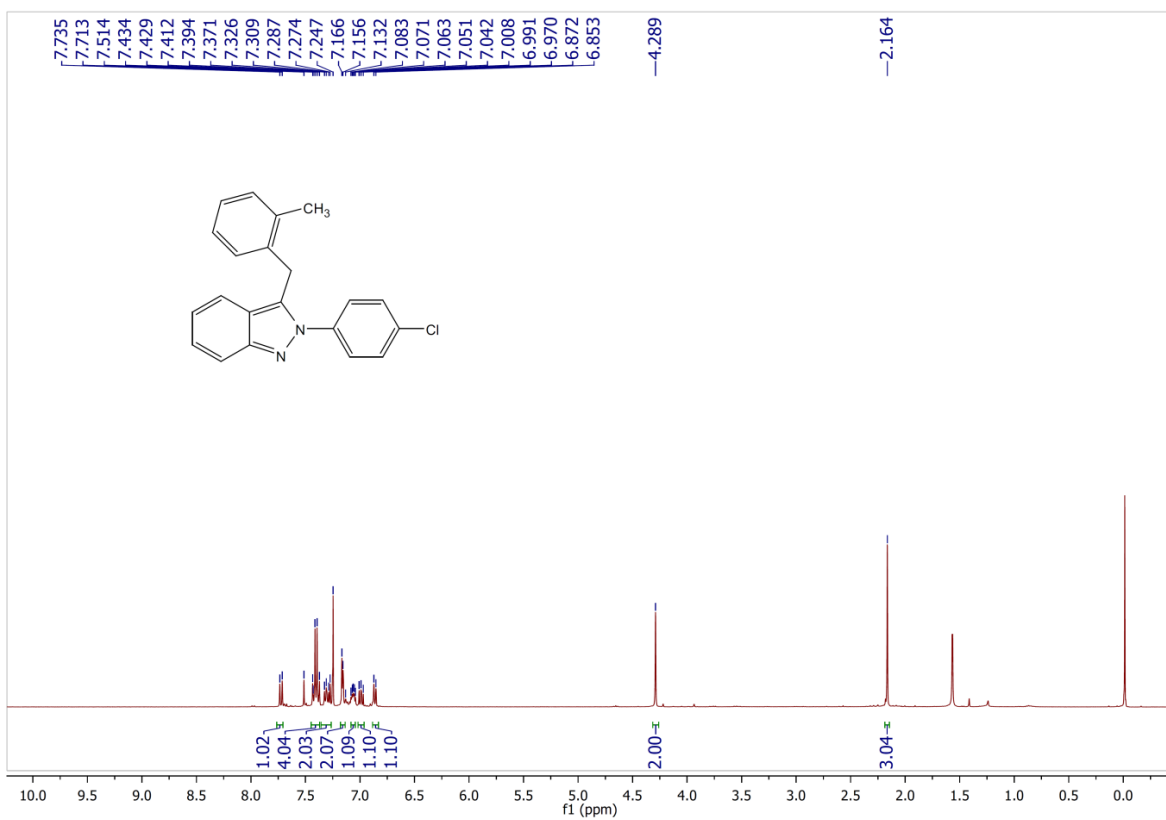

<sup>1</sup>H-NMR spectrum of compound 4c

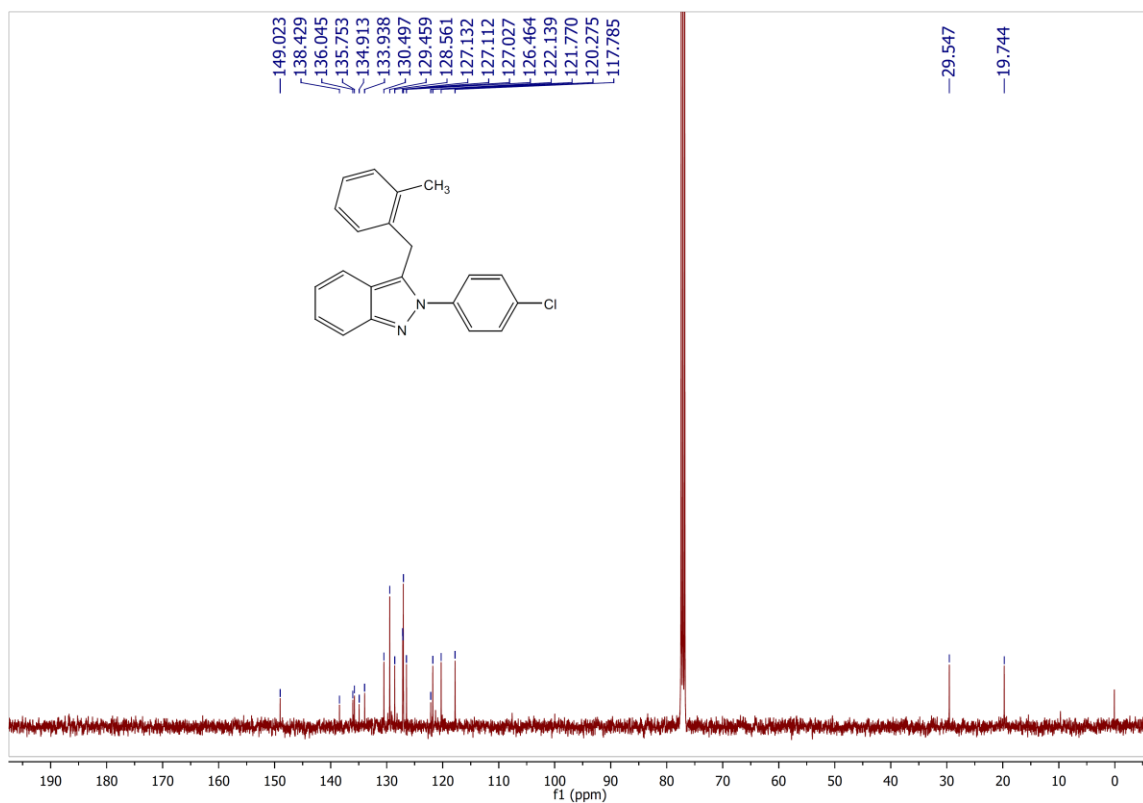

<sup>13</sup>C-NMR spectrum of compound 4c

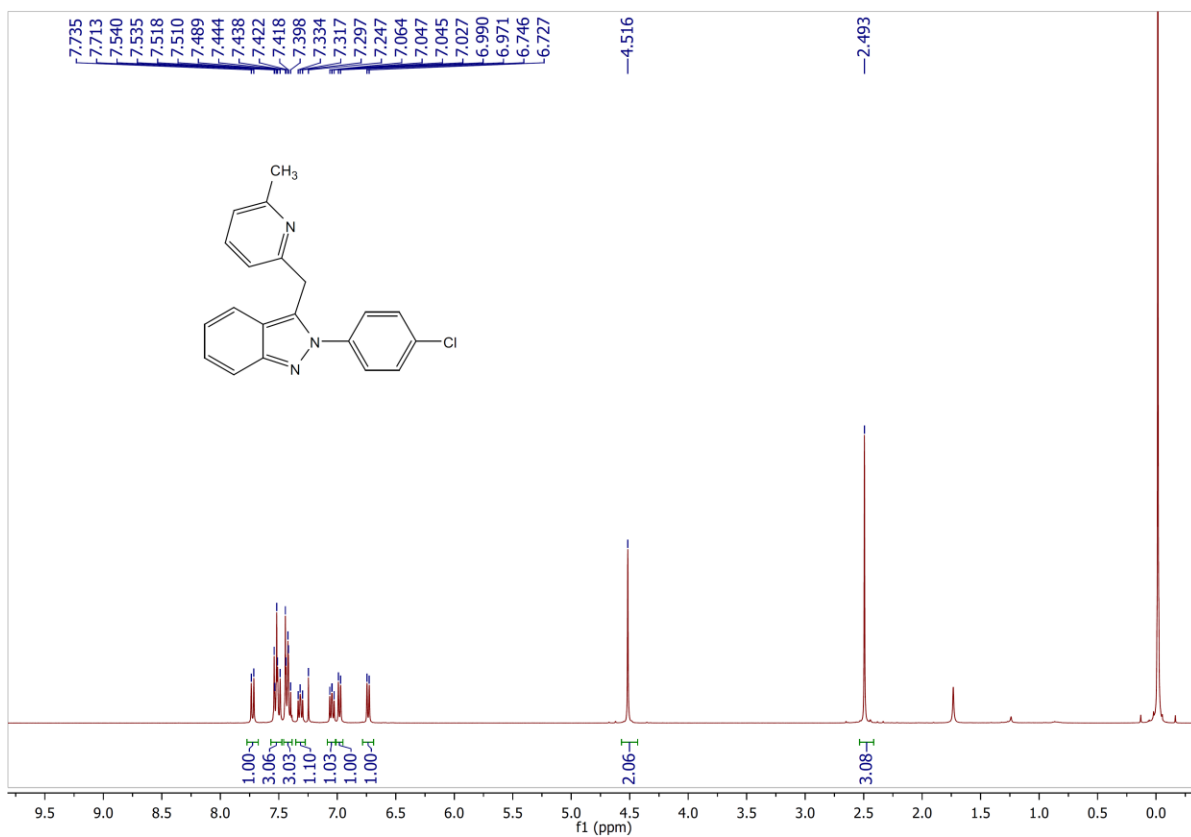

<sup>1</sup>H-NMR spectrum of compound 4d

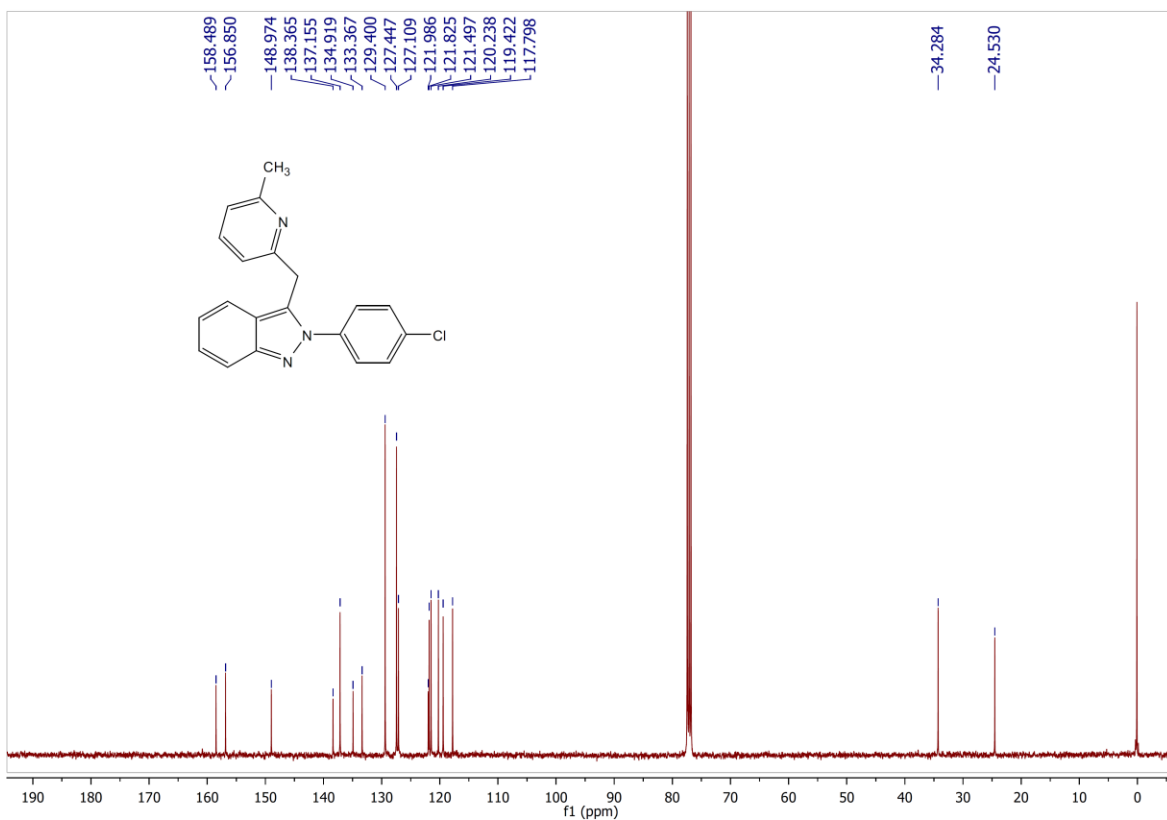

<sup>13</sup>C-NMR spectrum of compound 4d

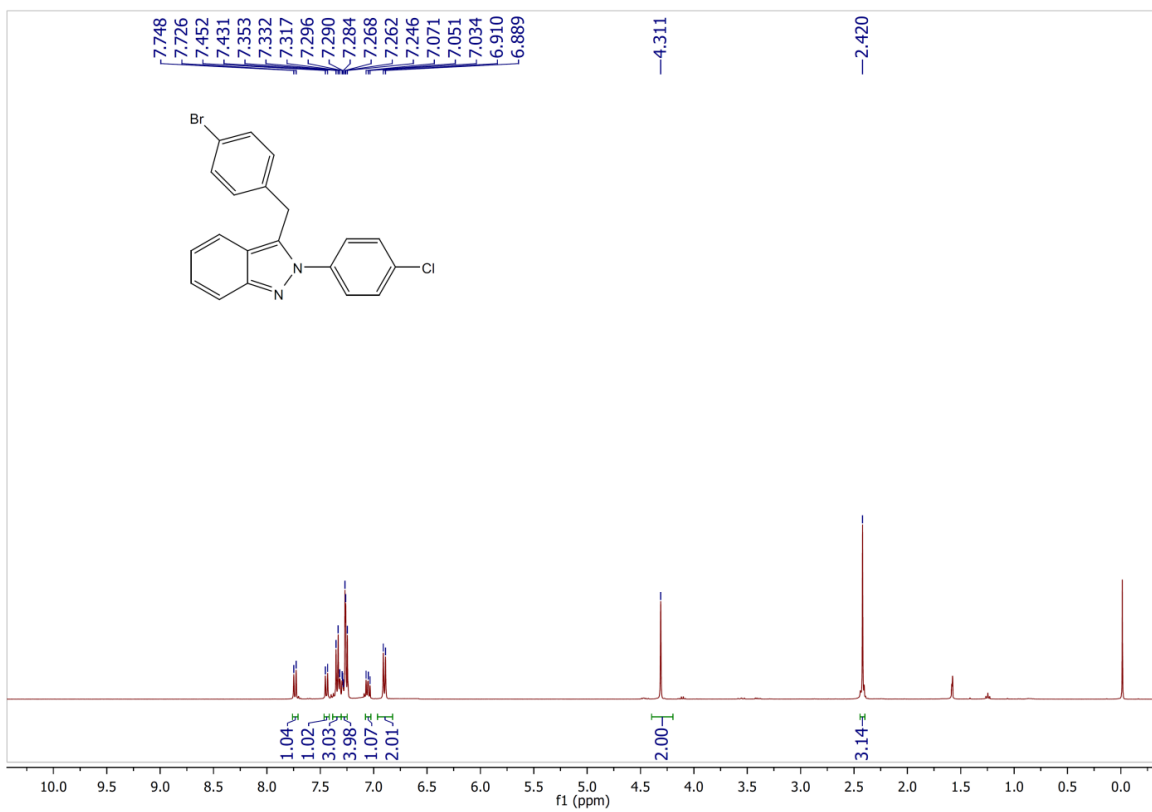

<sup>1</sup>H-NMR spectrum of compound 4e

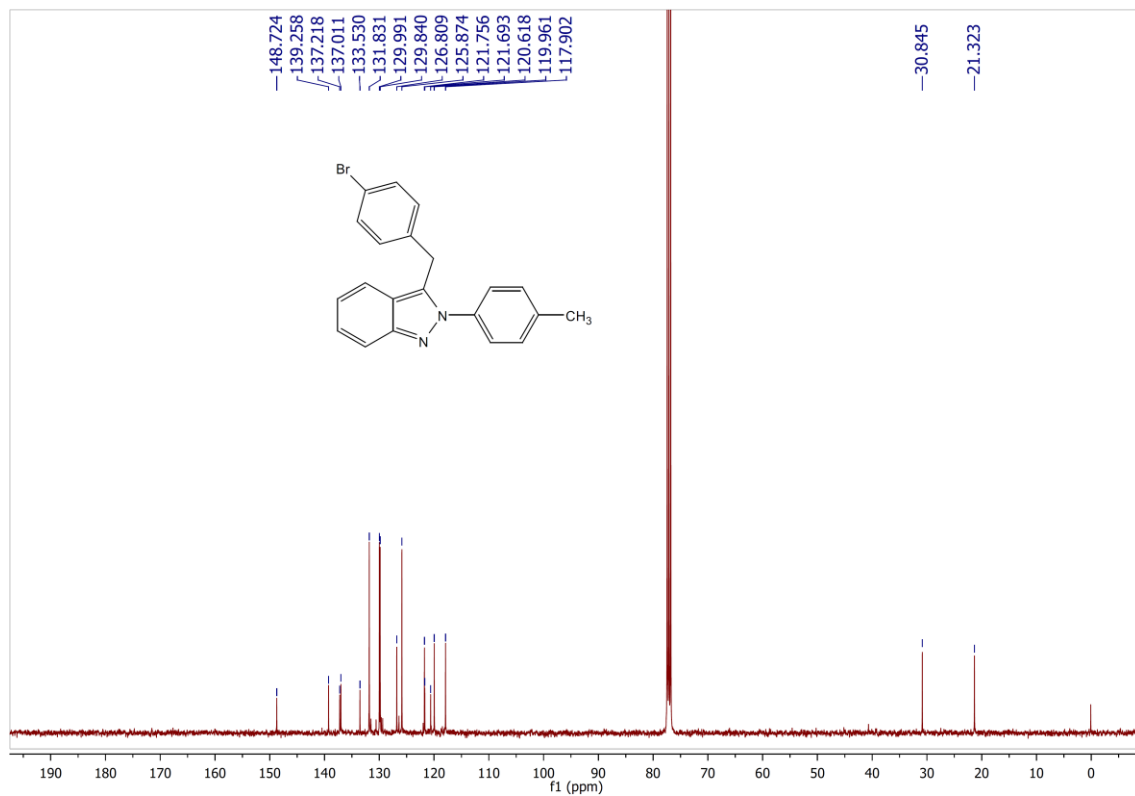

<sup>13</sup>C-NMR spectrum of compound 4e

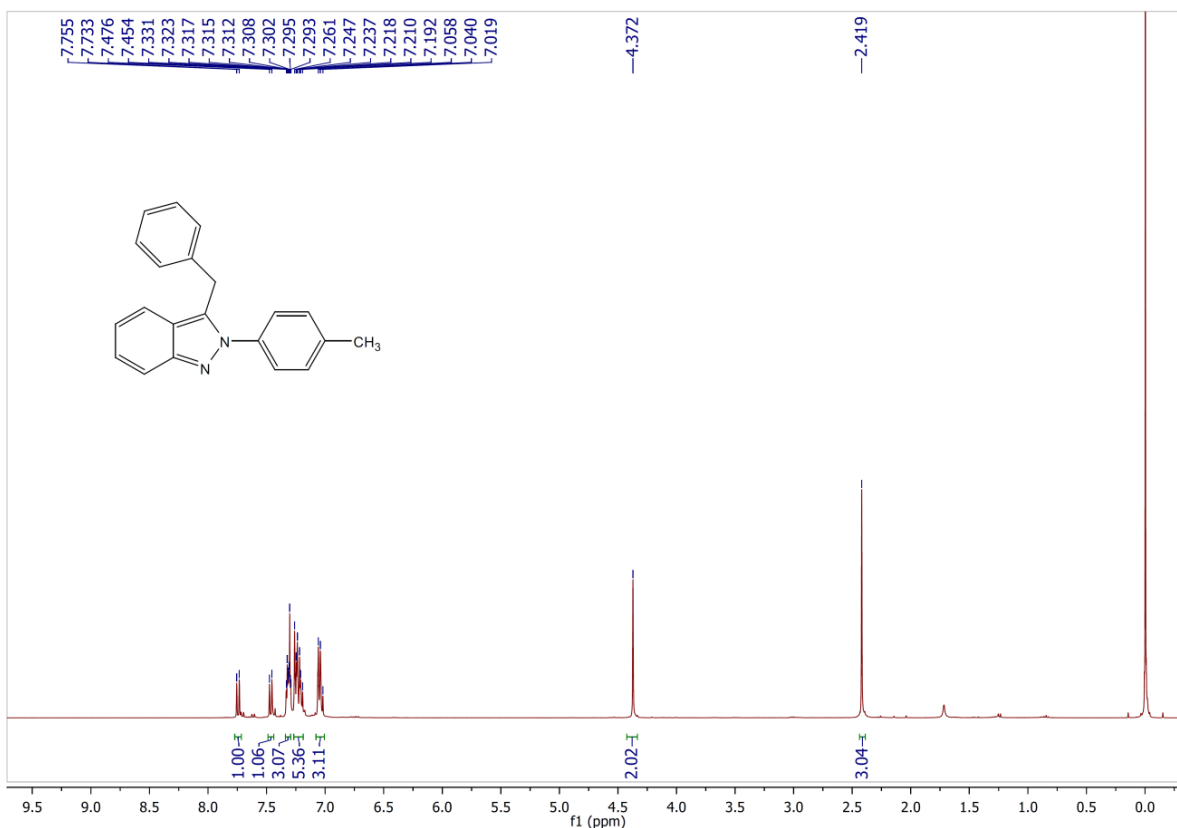

<sup>1</sup>H-NMR spectrum of compound **4f**

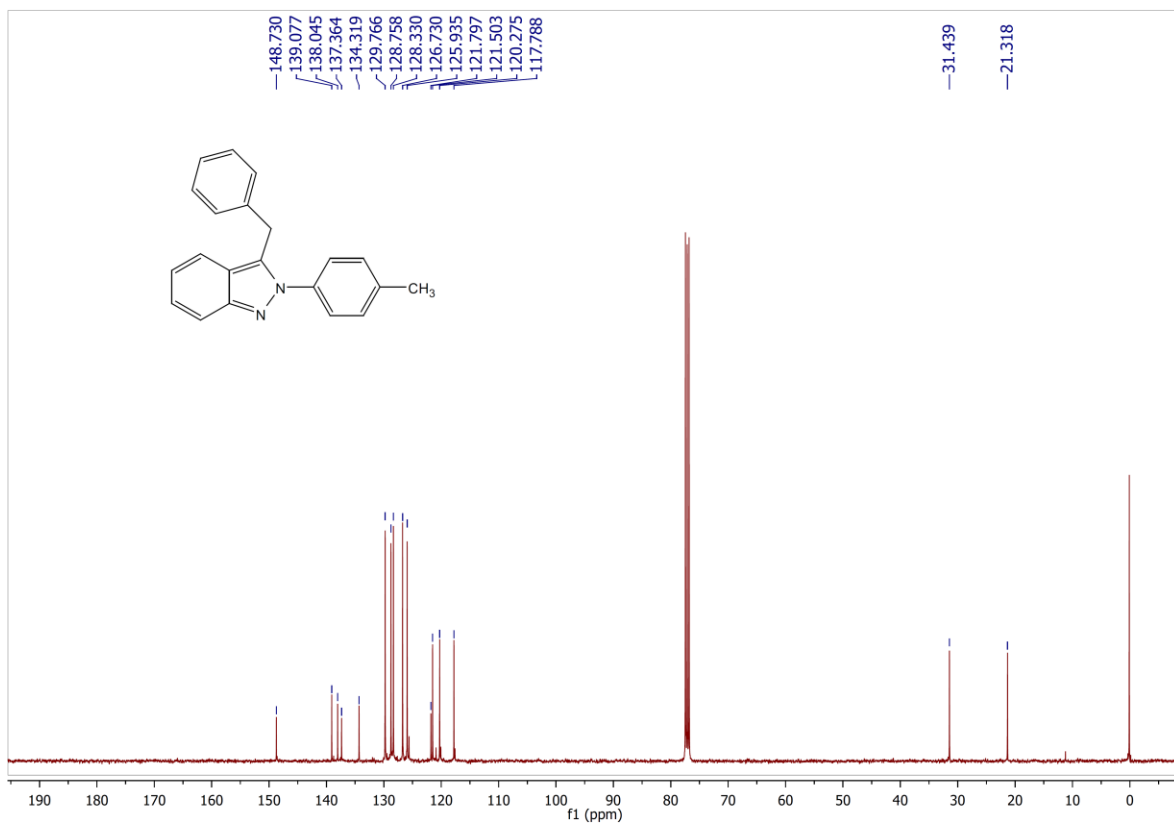

<sup>13</sup>C-NMR spectrum of compound **4f**

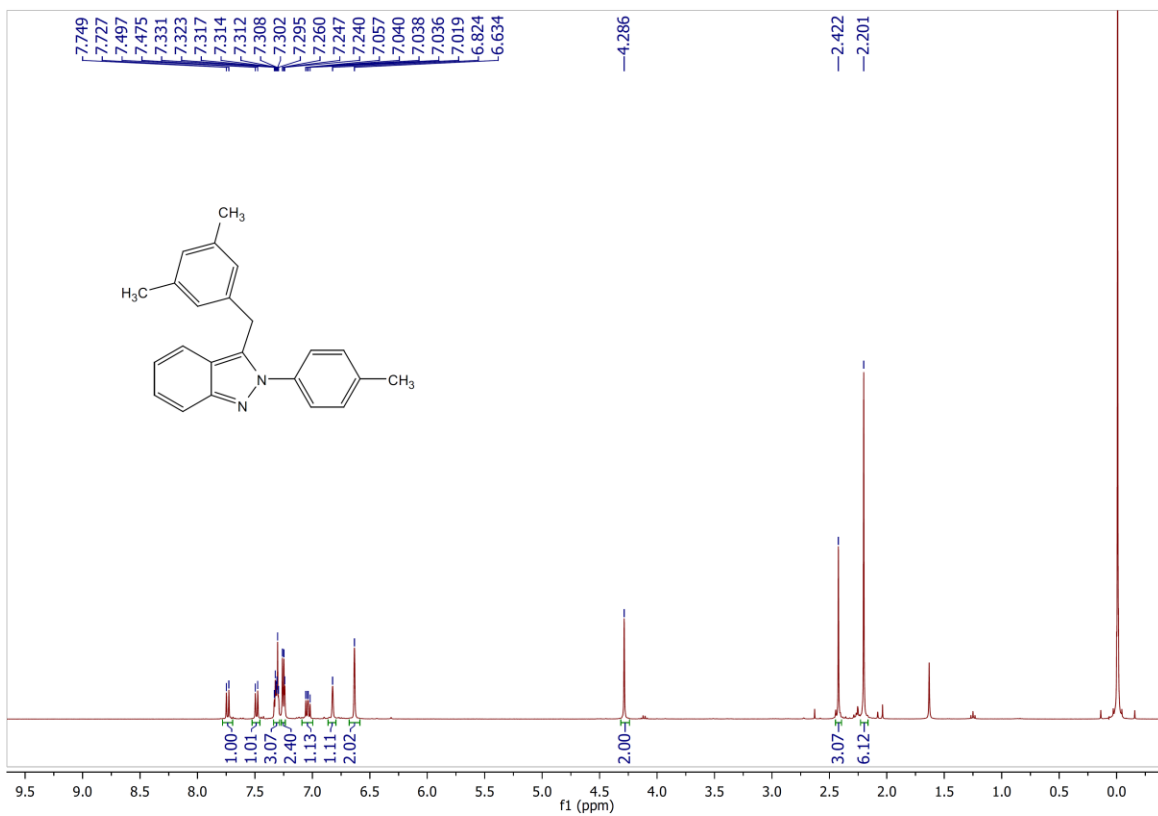

<sup>1</sup>H-NMR spectrum of compound **4g**

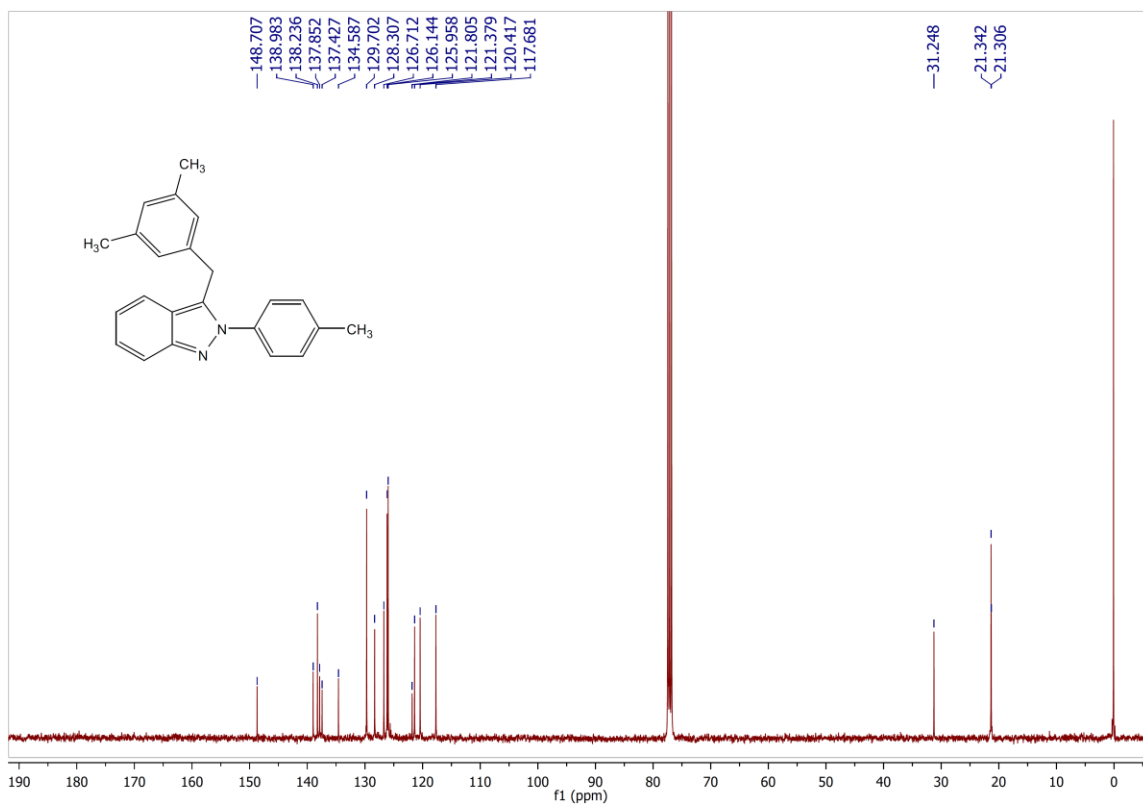

<sup>13</sup>C-NMR spectrum of compound **4g**

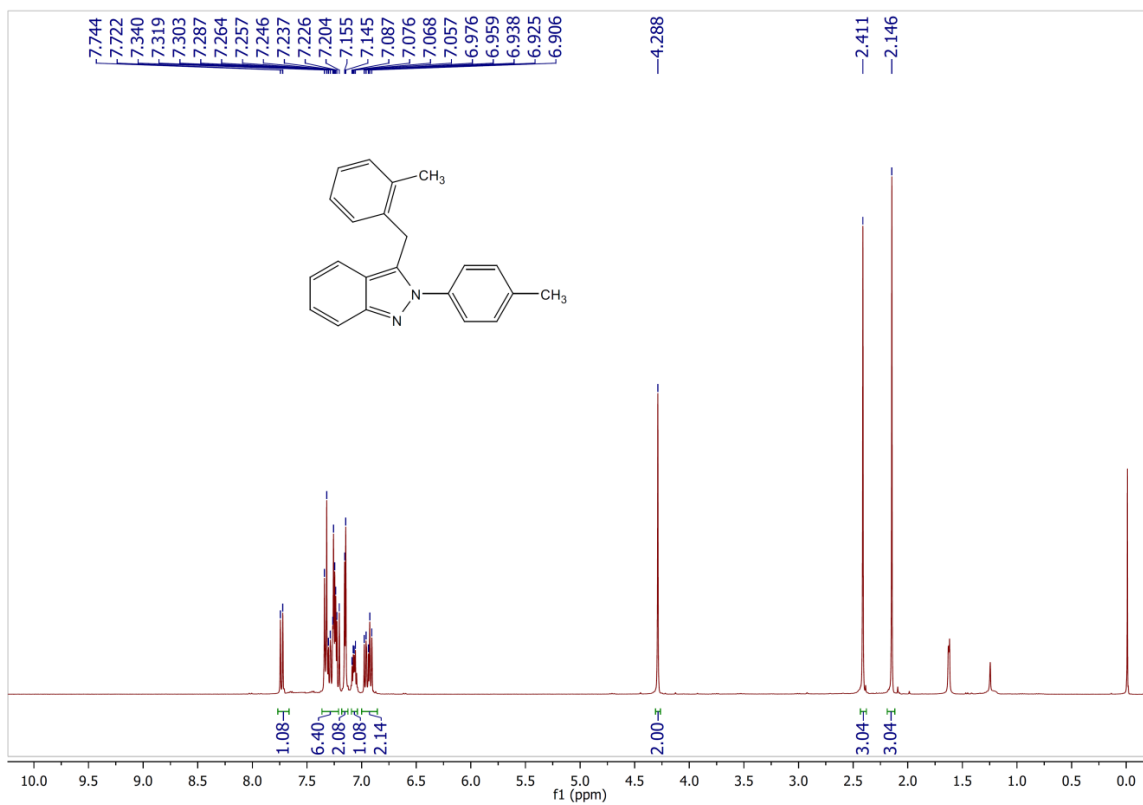

<sup>1</sup>H-NMR spectrum of compound 4h

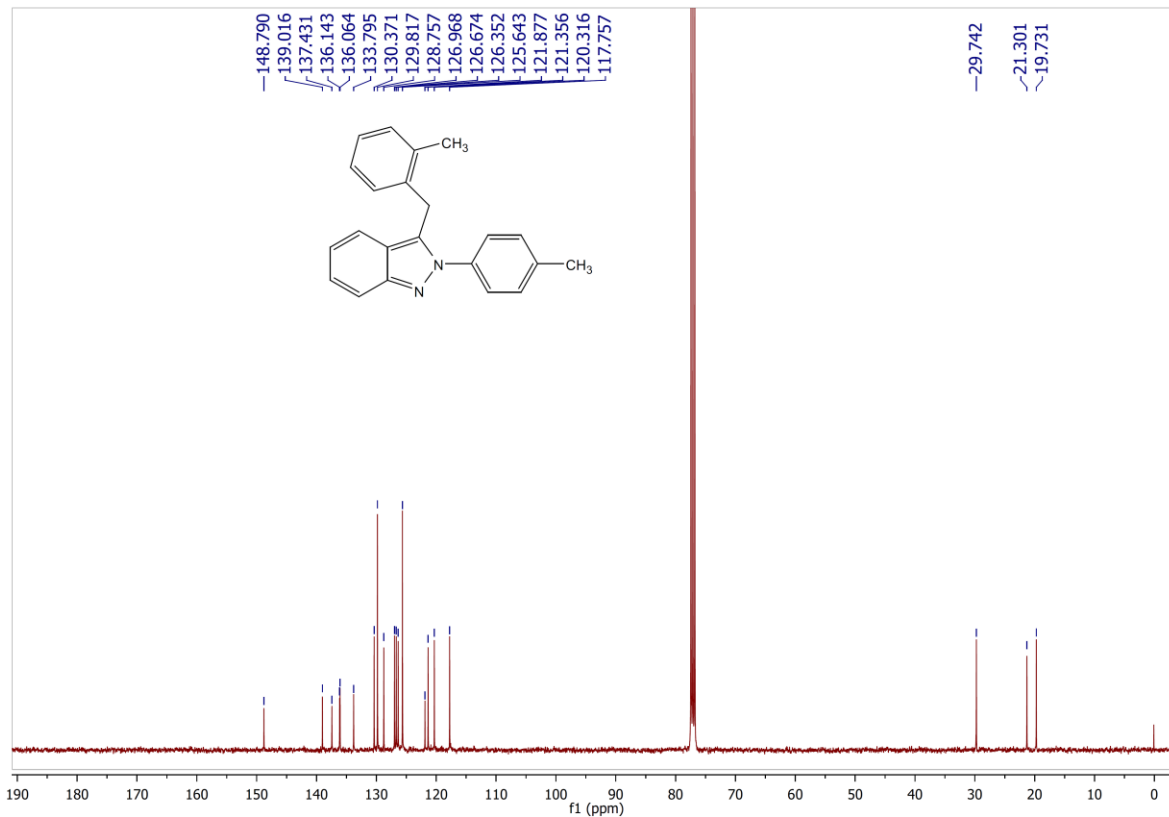

<sup>13</sup>C-NMR spectrum of compound 4h

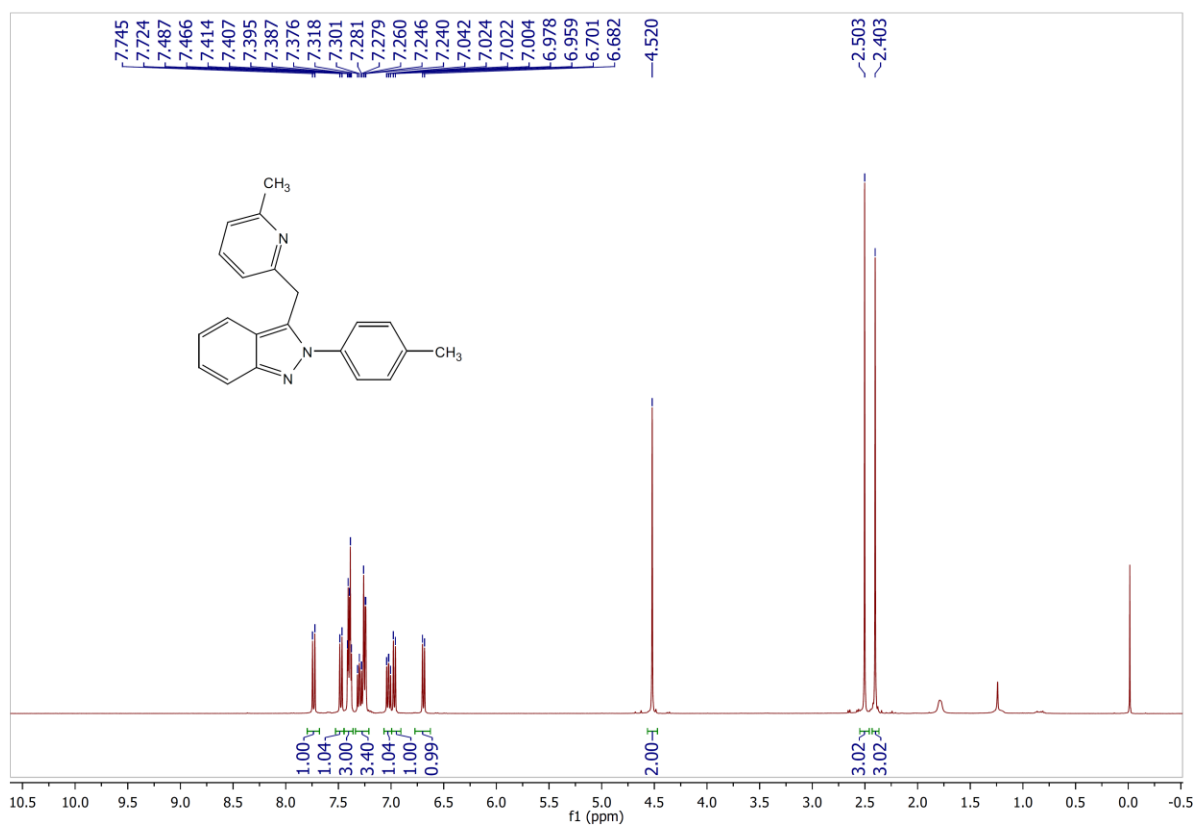

<sup>1</sup>H-NMR spectrum of compound **4i**

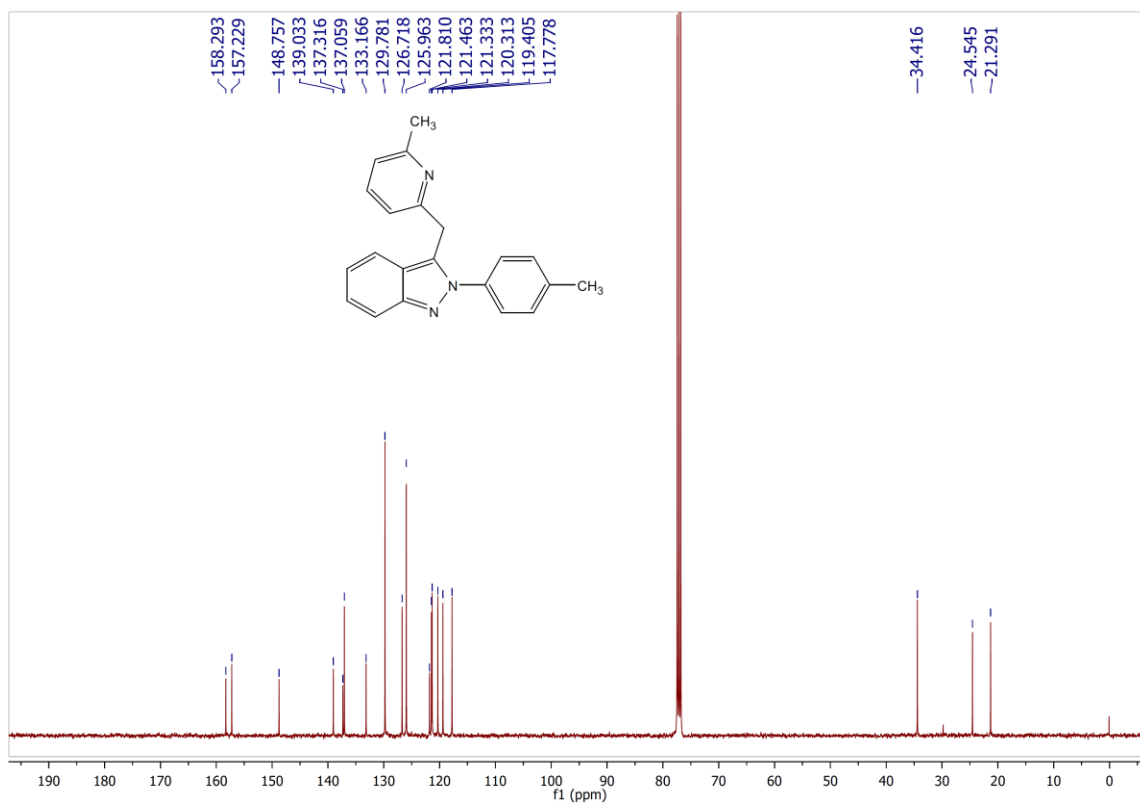

<sup>13</sup>C-NMR spectrum of compound **4i**

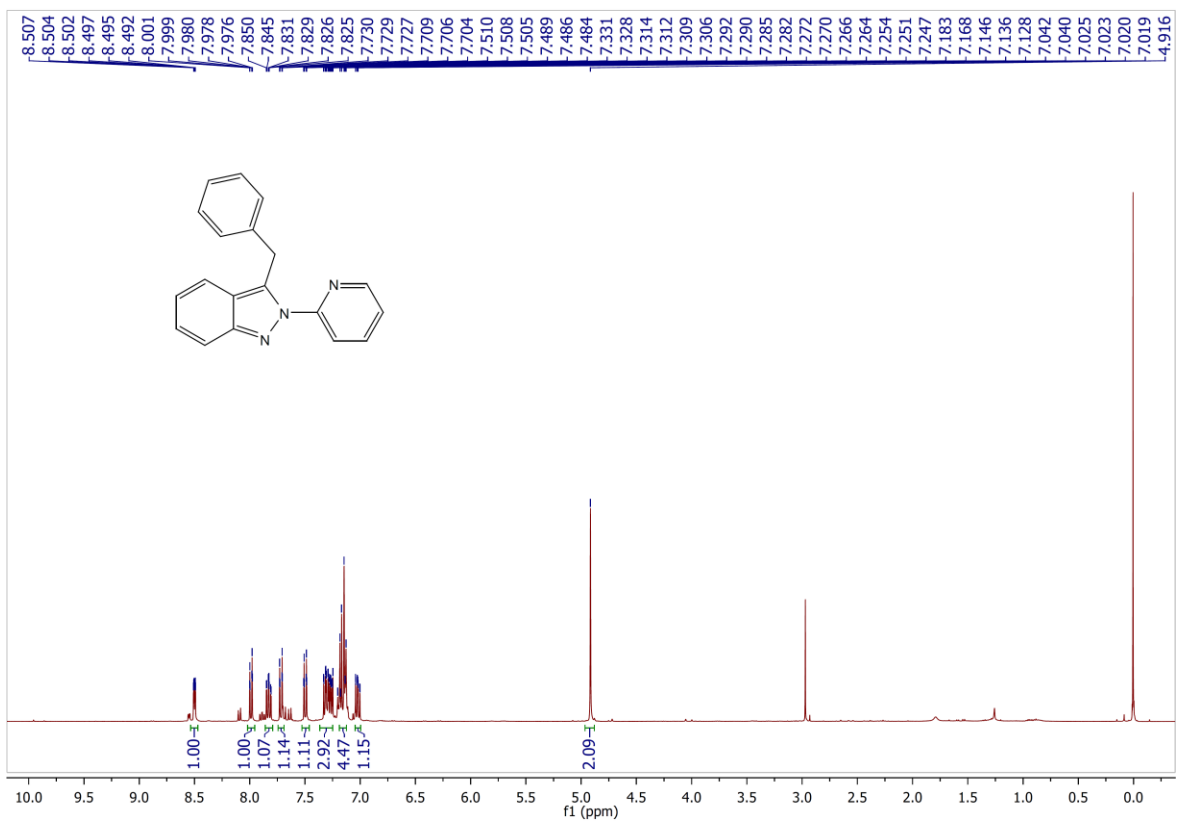

$^1\text{H-NMR}$  spectrum of compound 4j

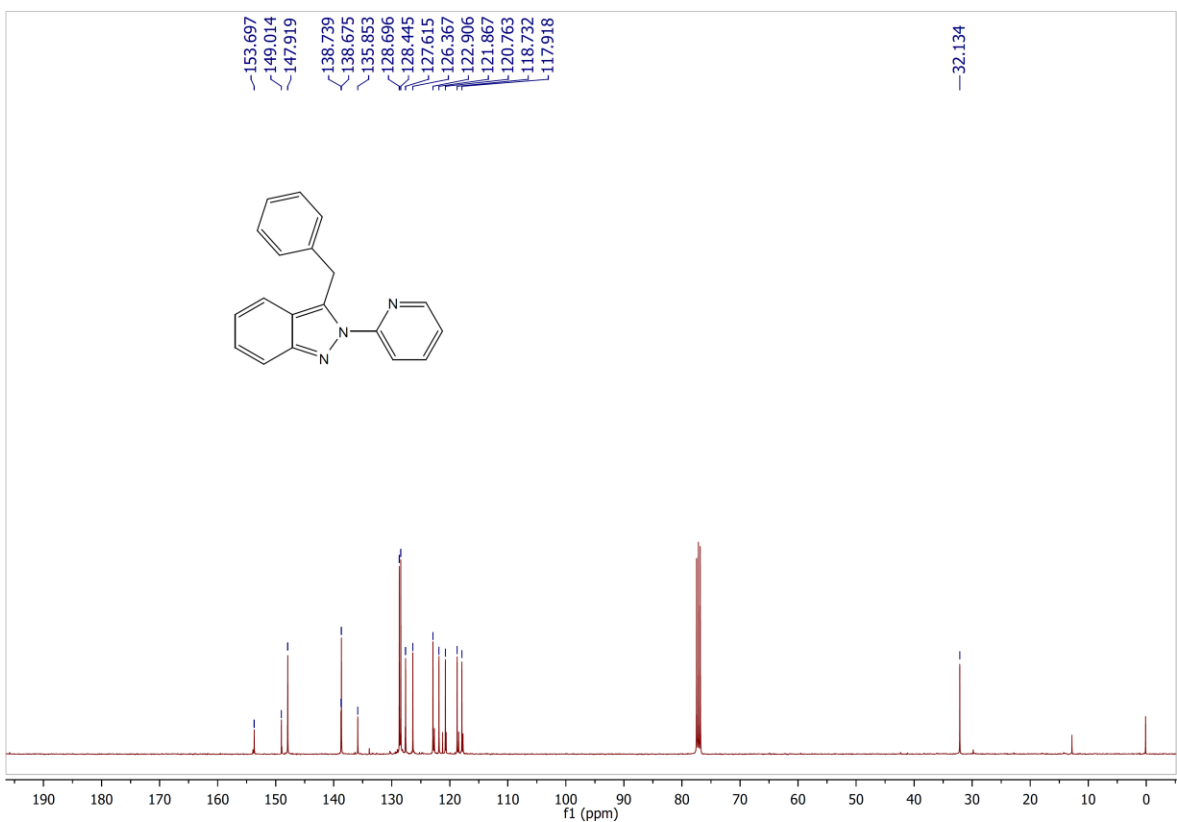

$^{13}\text{C-NMR}$  spectrum of compound 4j



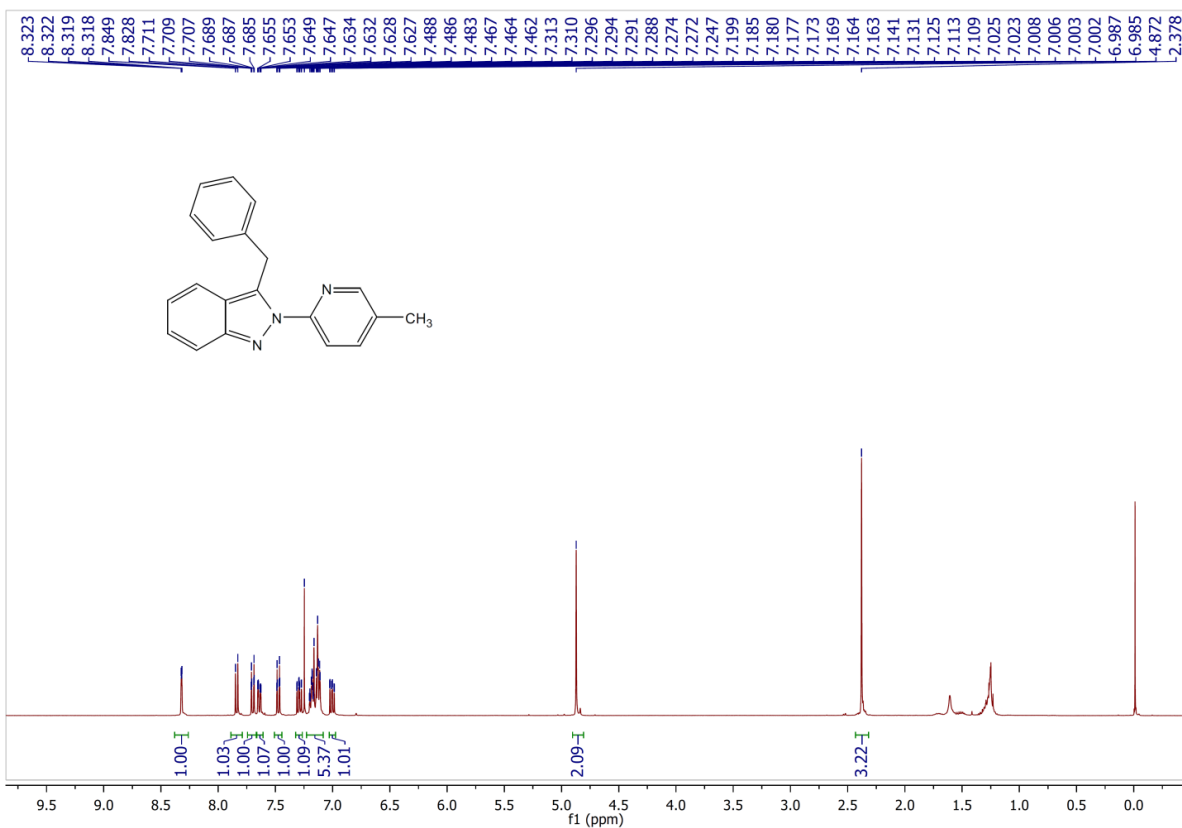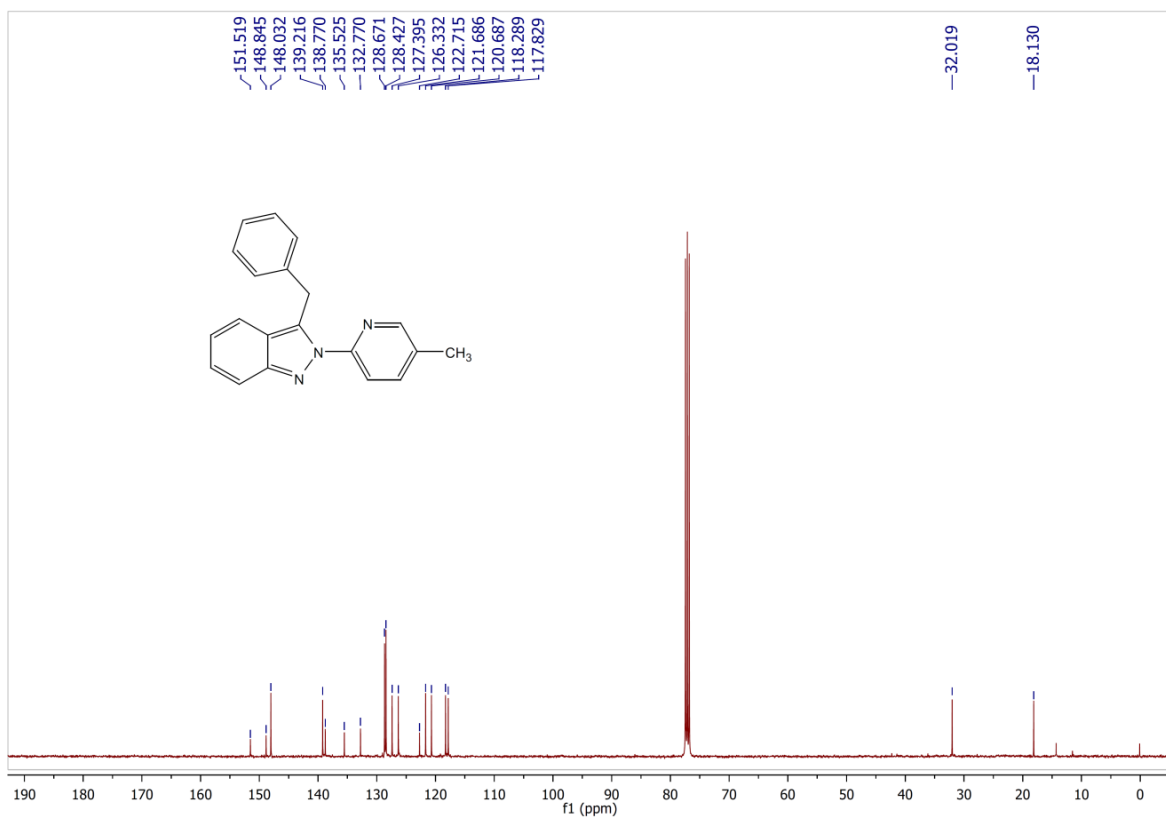

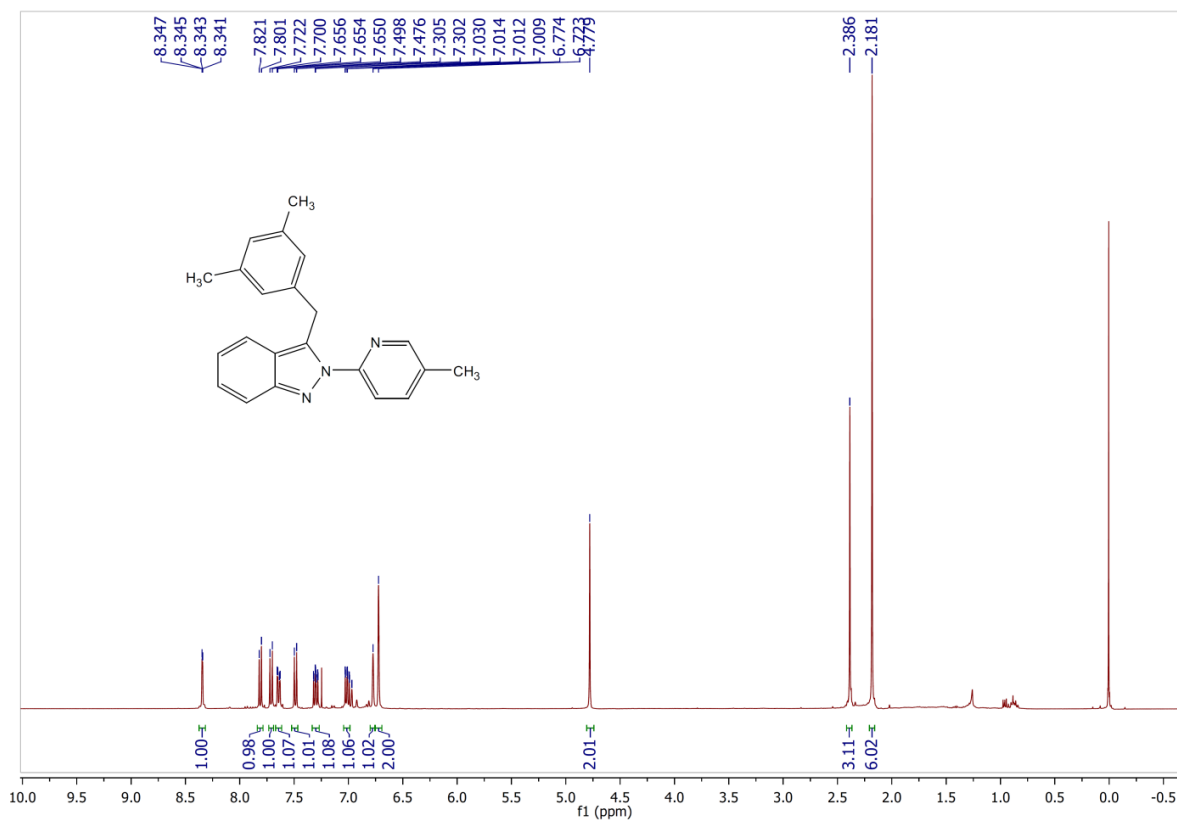

<sup>1</sup>H-NMR spectrum of compound **4l**

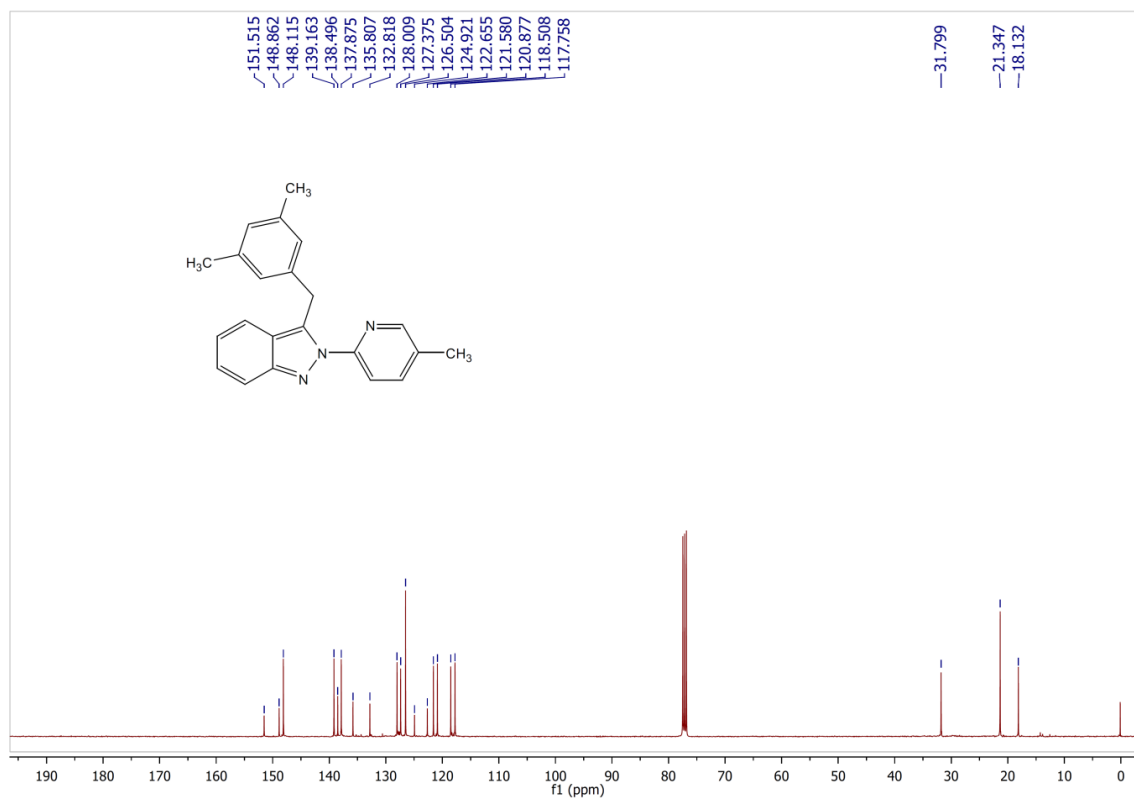

<sup>13</sup>C-NMR spectrum of compound **4l**

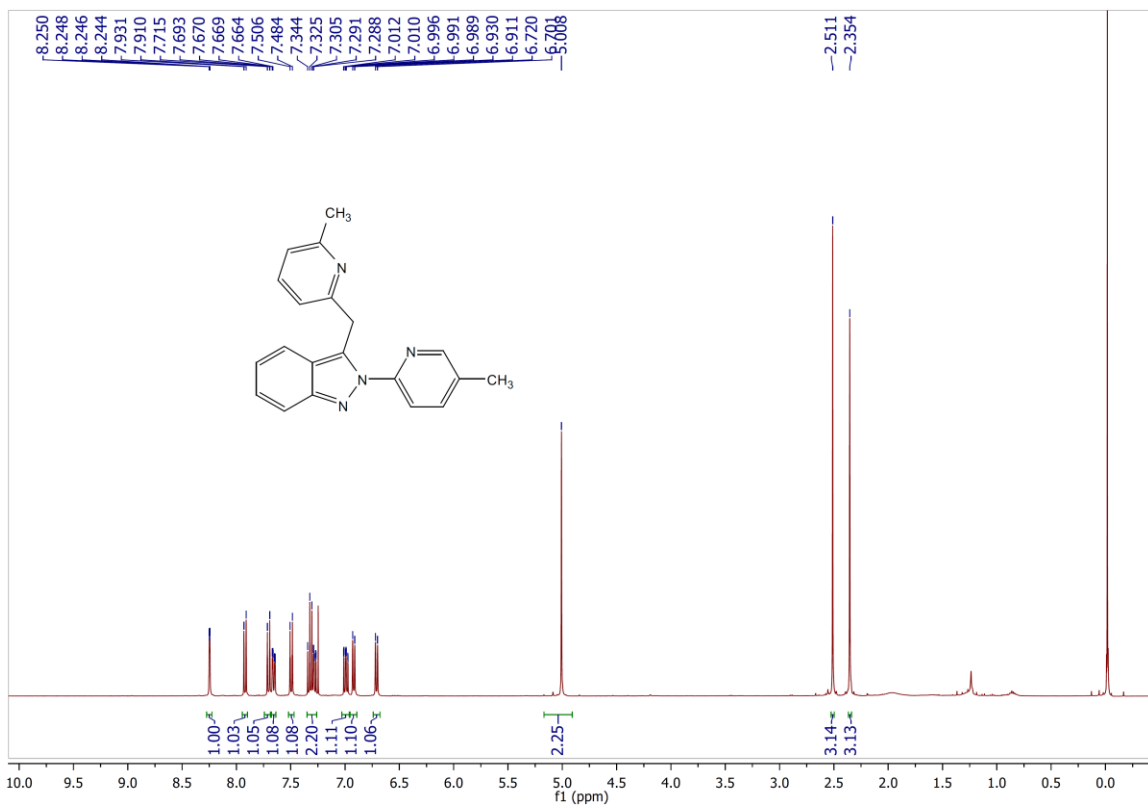

<sup>1</sup>H-NMR spectrum of compound **4m**

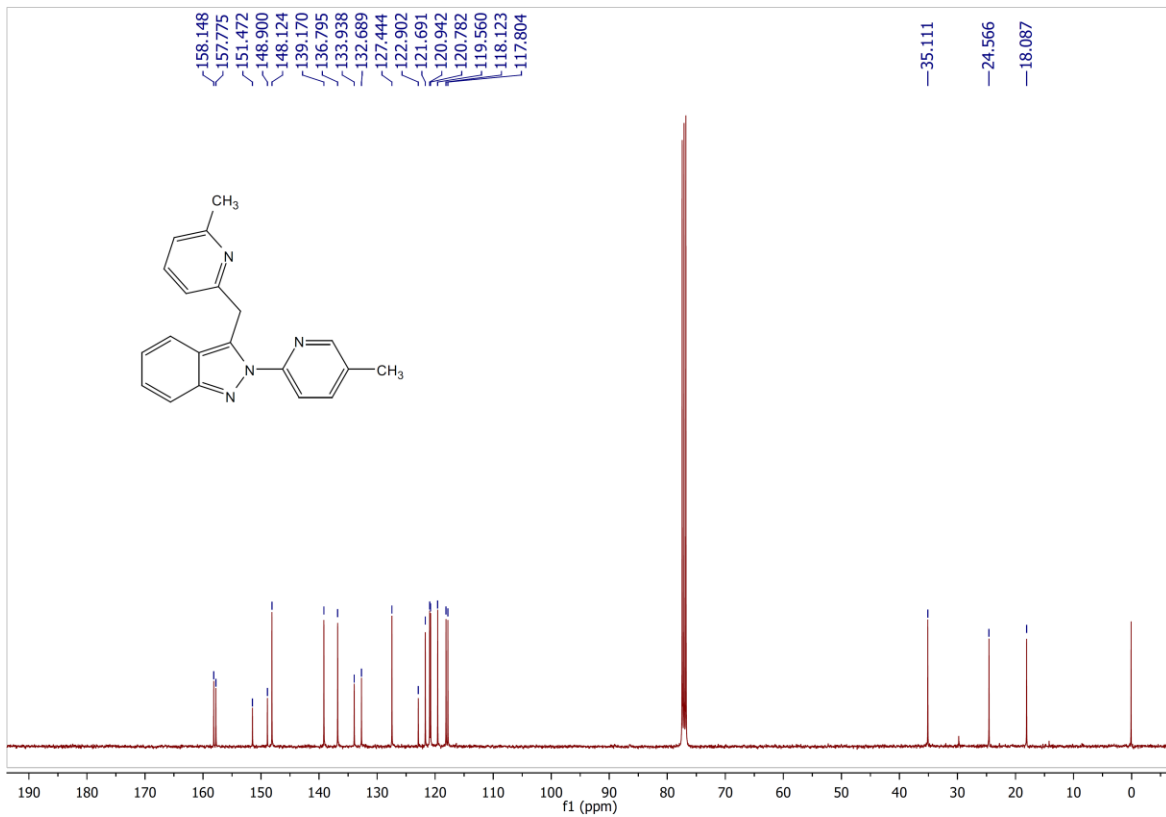

<sup>13</sup>C-NMR spectrum of compound **4m**

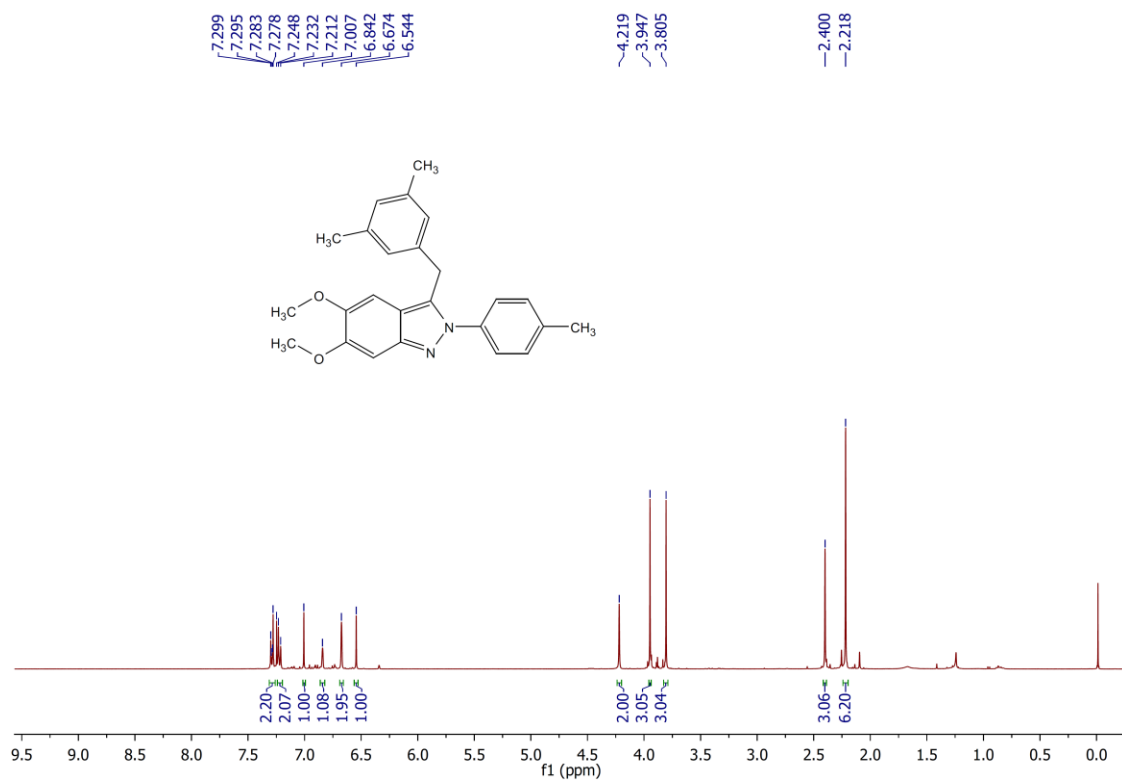

<sup>1</sup>H-NMR spectrum of compound **4n**

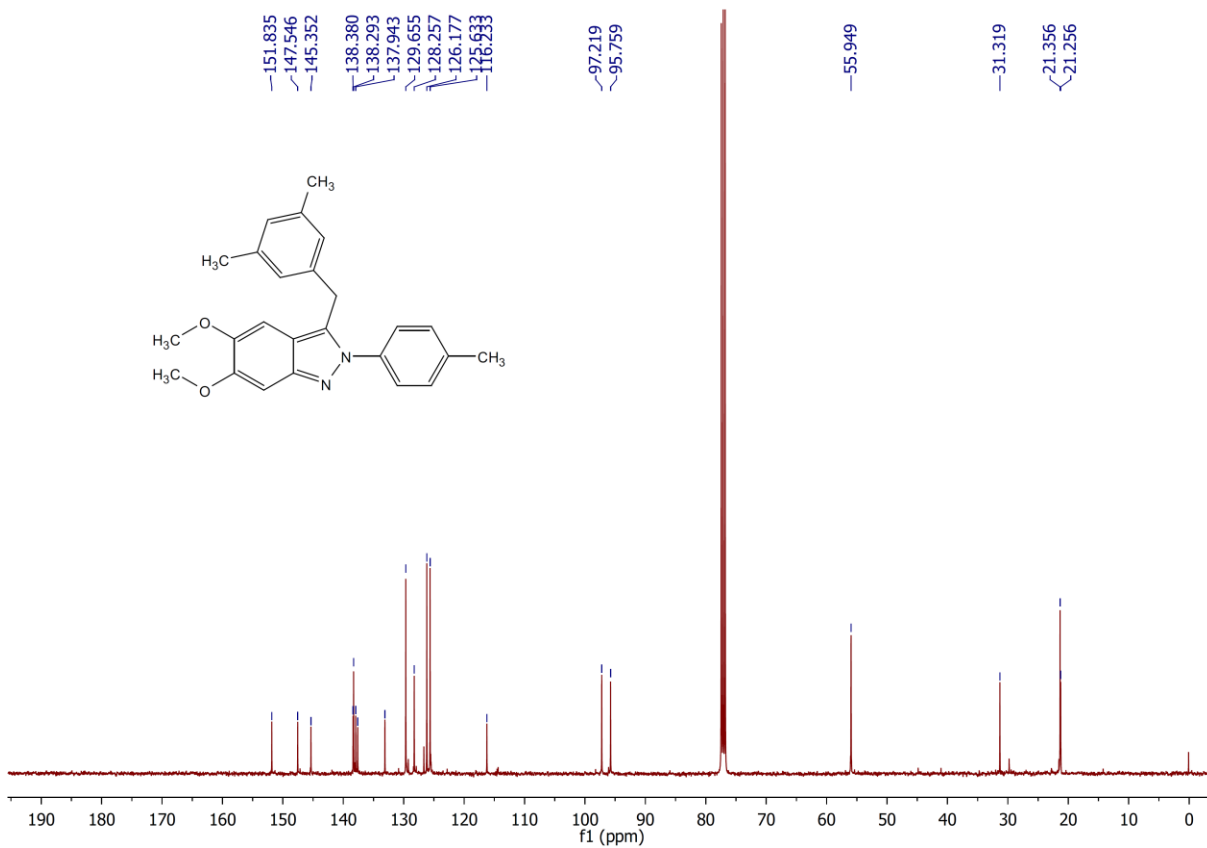

<sup>13</sup>C-NMR spectrum of compound **4n**

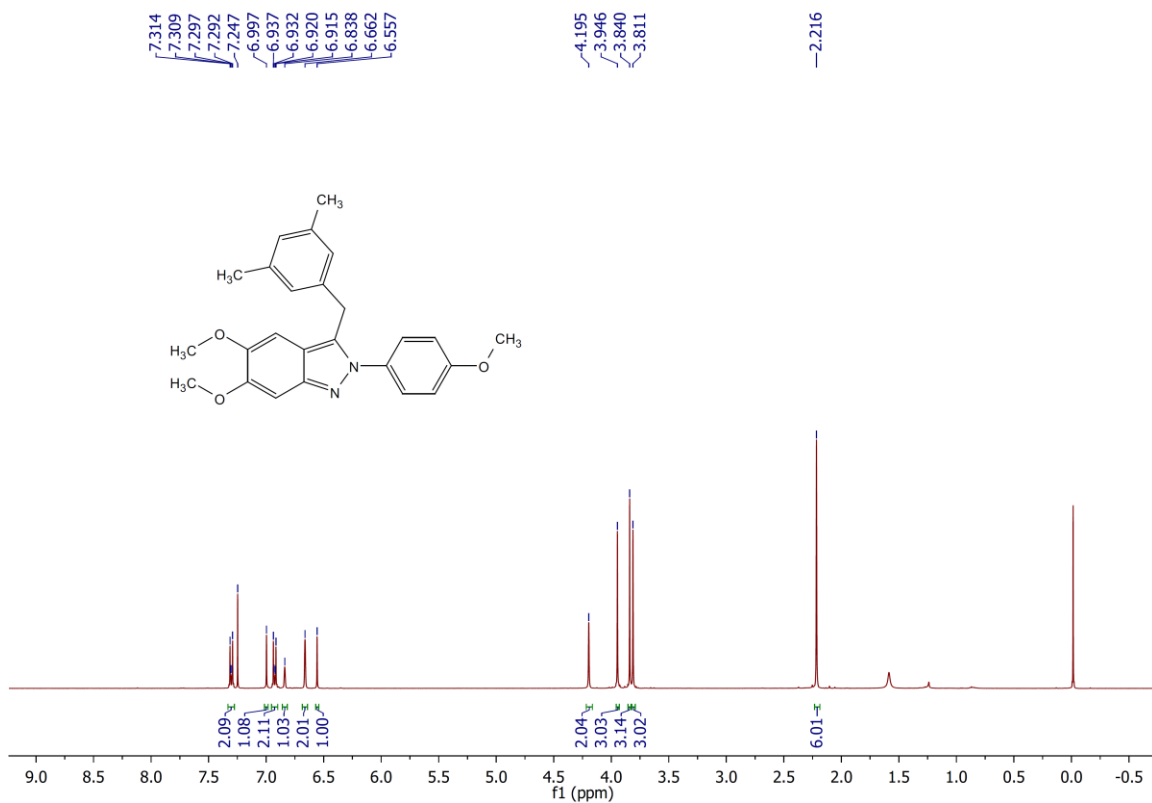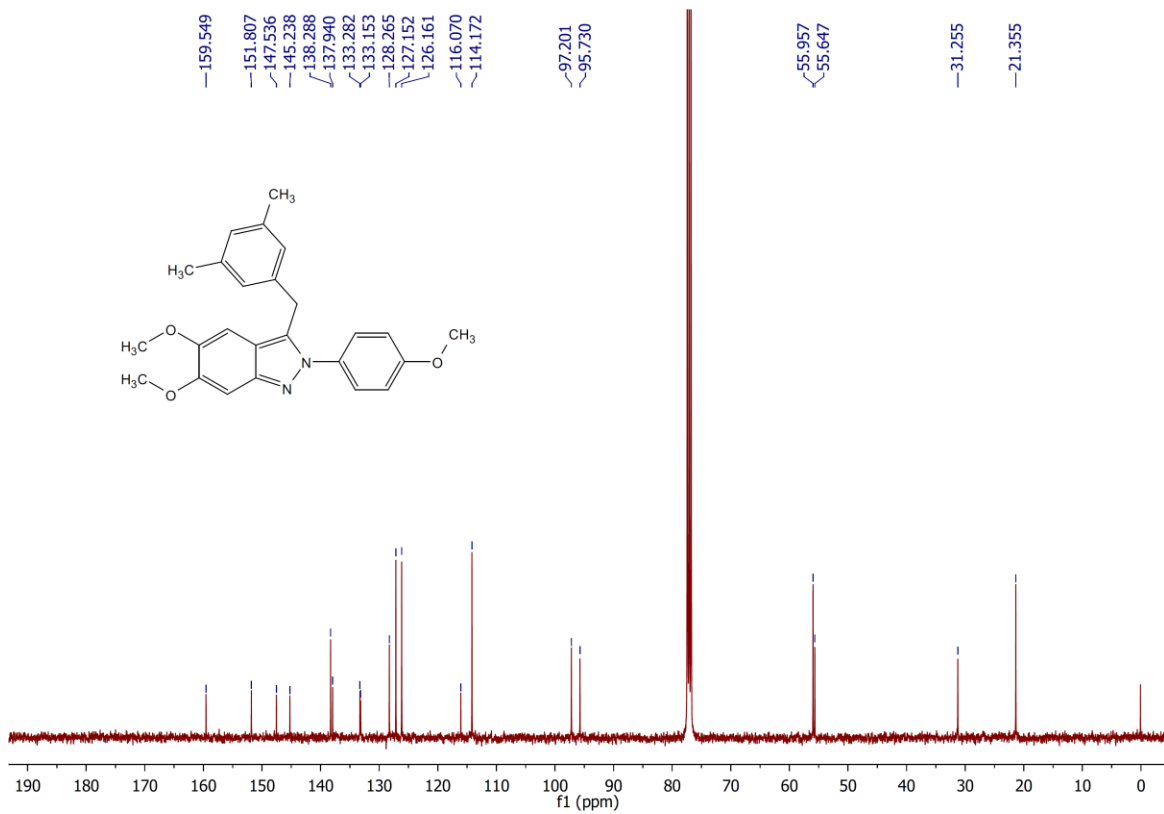

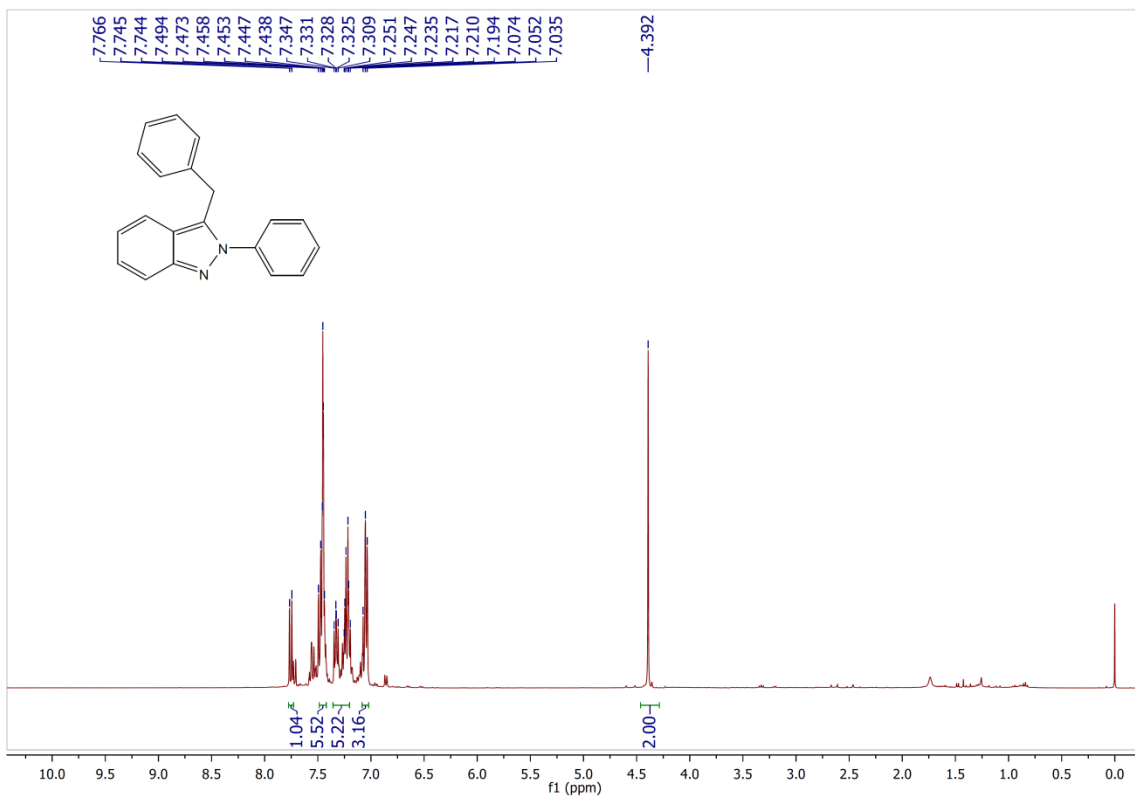

<sup>1</sup>H-NMR spectrum of compound 4p

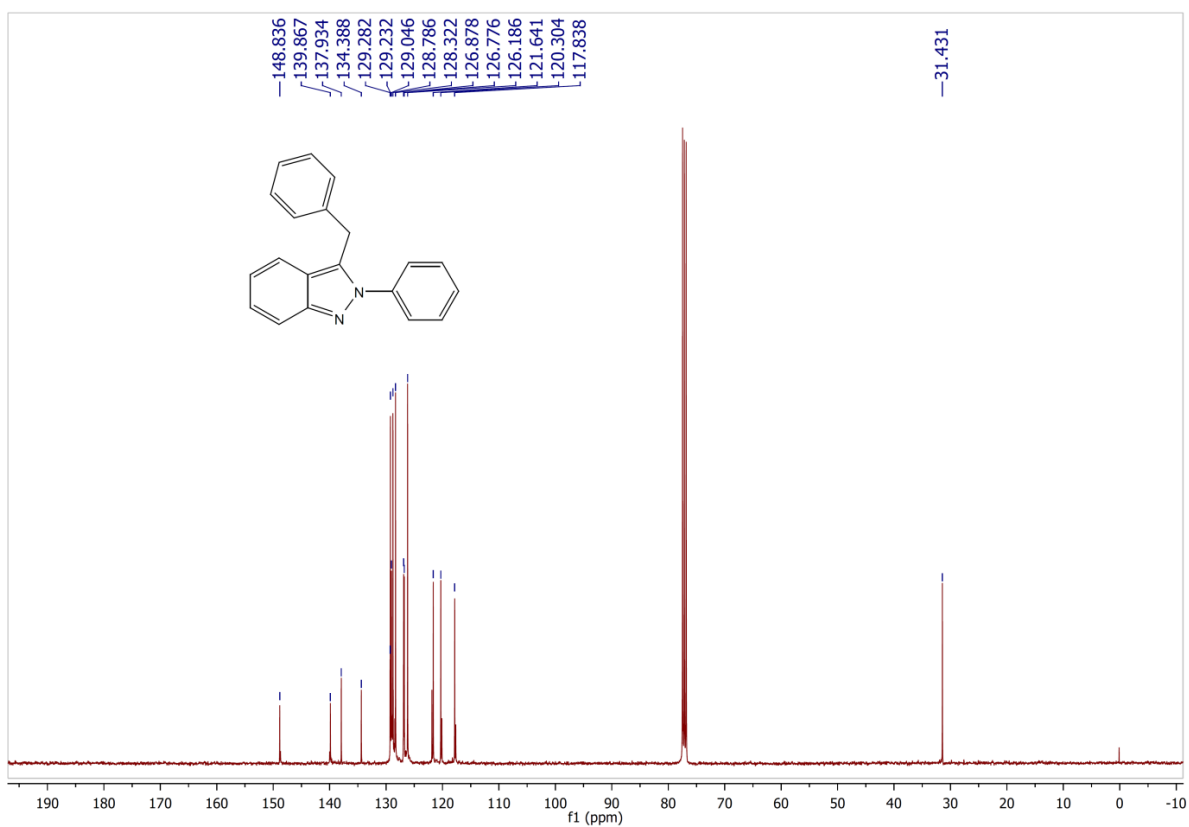

<sup>13</sup>C-NMR spectrum of compound 4p

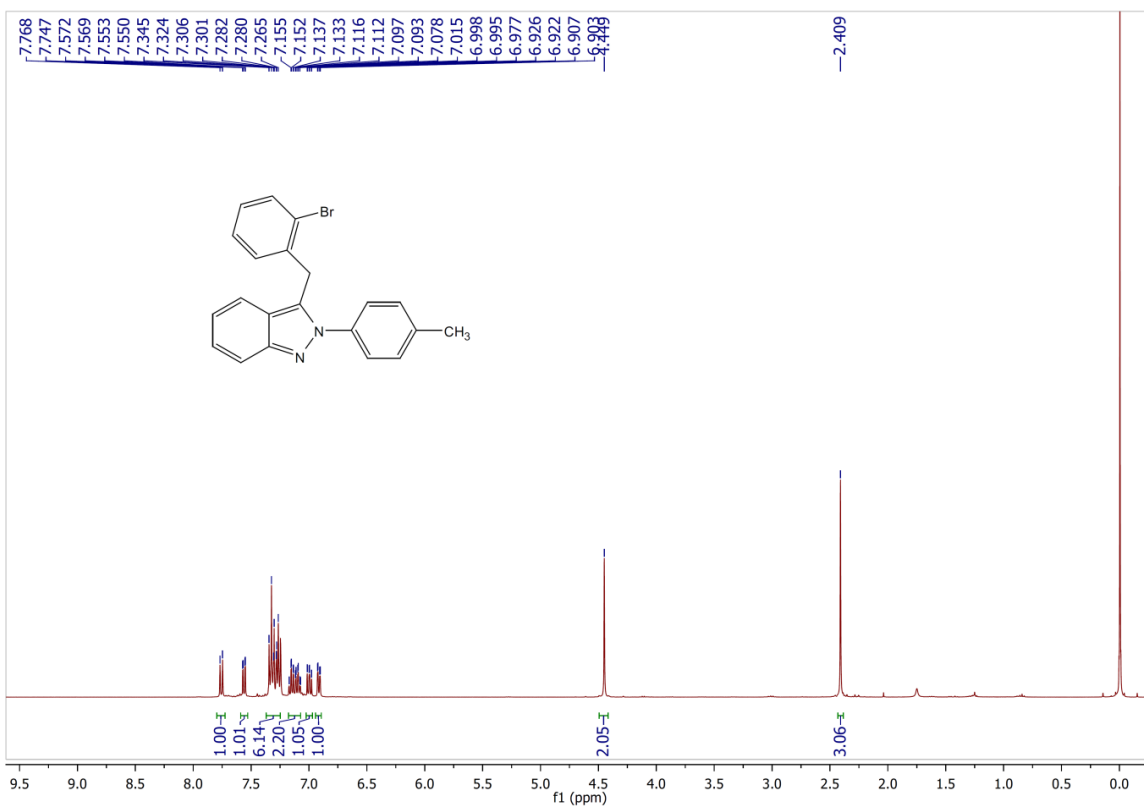

<sup>1</sup>H-NMR spectrum of compound **4q**

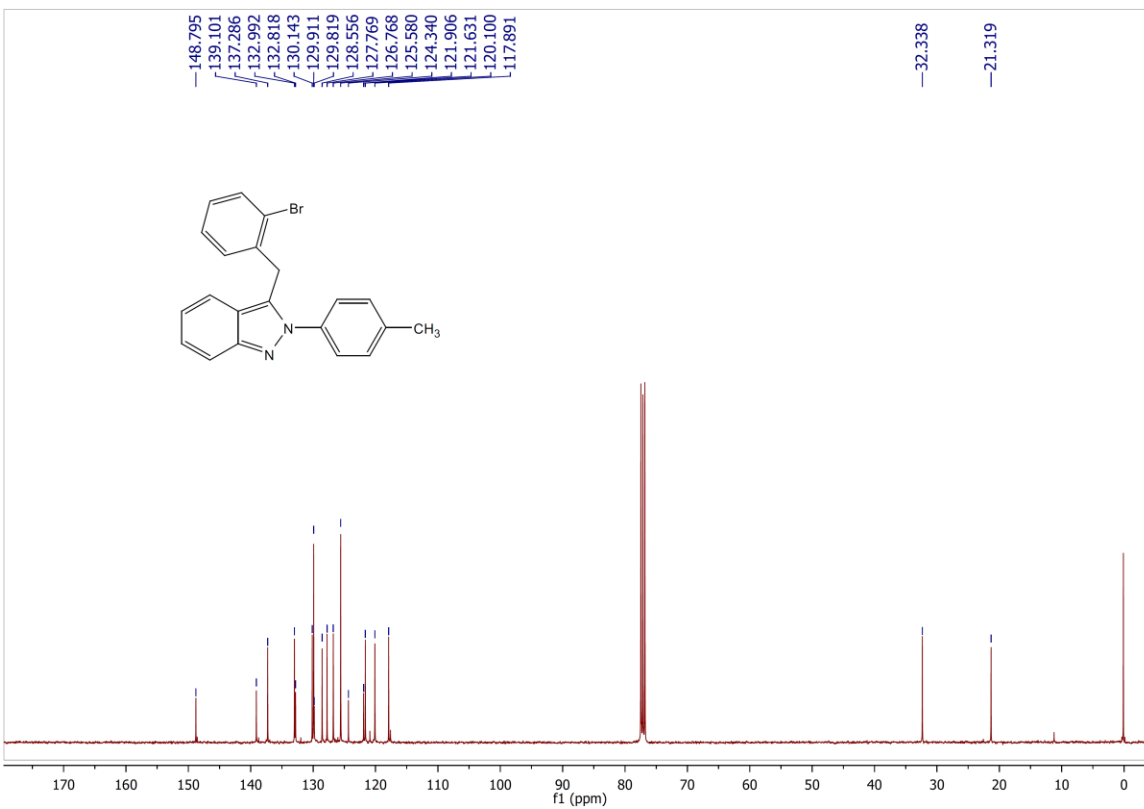

<sup>13</sup>C-NMR spectrum of compound **4q**

## 2. <sup>1</sup>H NMR spectrum of compound 5.

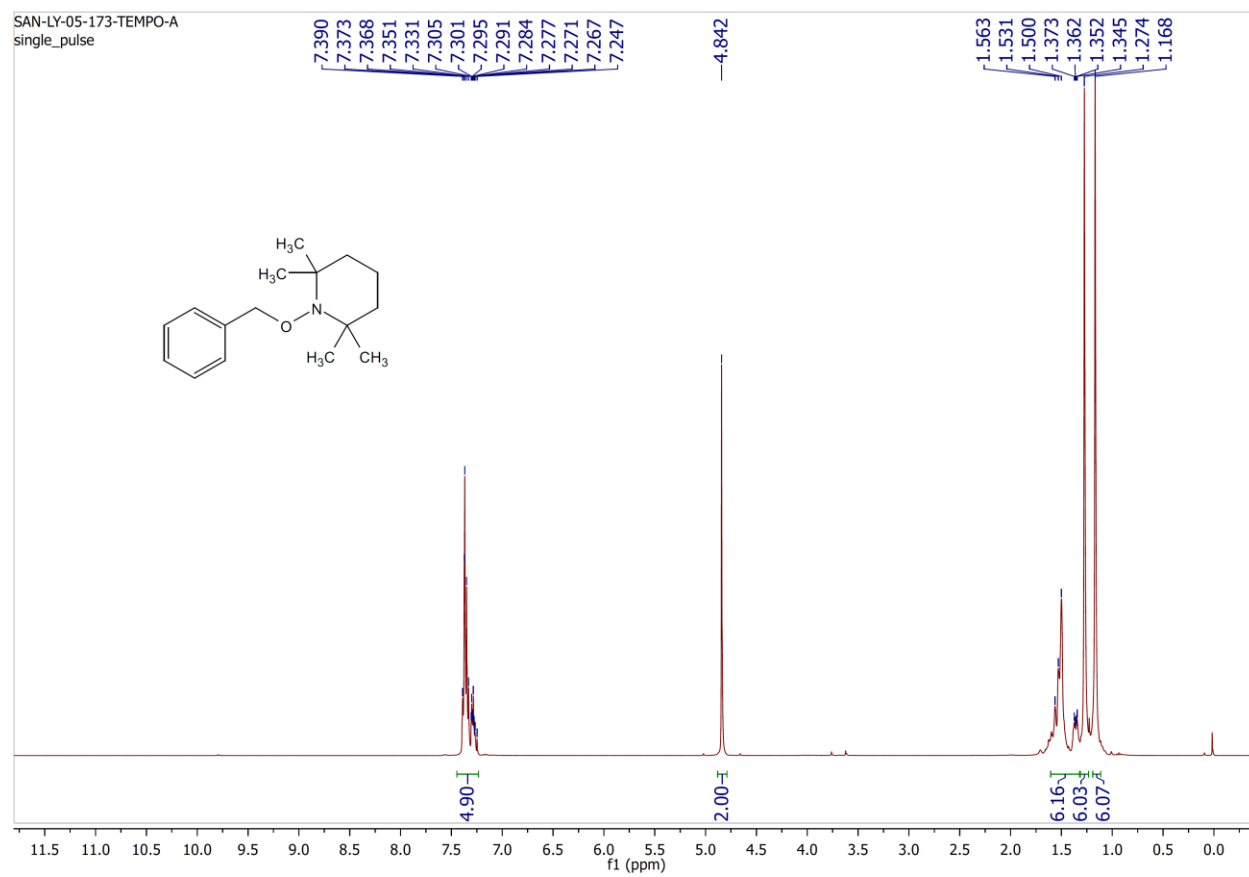

Supplement: d0ob01282c1.pdf [file d0ob01282c1.pdf]
